1 **A genome-wide screen identifies genes that suppress the accumulation of spontaneous**  
2 **mutations in young and aged yeast cells**

3

4 Short Title: **A screen for mutation suppression genes in young and aged yeast cells**

5

6 Daniele Novarina<sup>1</sup>, Georges E. Janssens<sup>1</sup>, Koen Bokern<sup>1</sup>, Tim Schut<sup>1</sup>, Noor C. van Oerle<sup>1</sup>,

7 Hinke G. Kazemier<sup>1</sup>, Liesbeth M. Veenhoff<sup>1</sup> and Michael Chang<sup>1\*</sup>

8

9 <sup>1</sup>European Research Institute for the Biology of Ageing, University of Groningen, University

10 Medical Center Groningen, Groningen, the Netherlands

11

12 \*Corresponding author

13 E-mail: [m.chang@umcg.nl](mailto:m.chang@umcg.nl) (MC)

## 14 **Abstract**

15 To ensure proper transmission of genetic information, cells need to preserve and faithfully  
16 replicate their genome, and failure to do so leads to genome instability, a hallmark of both  
17 cancer and aging. Defects in genes involved in guarding genome stability cause several human  
18 progeroid syndromes, and an age-dependent accumulation of mutations has been observed in  
19 different organisms, from yeast to mammals. However, it is unclear if the spontaneous mutation  
20 rate changes during aging, and if specific pathways are important for genome maintenance in  
21 old cells. We developed a high-throughput replica-pinning approach to screen for genes  
22 important to suppress the accumulation of spontaneous mutations during yeast replicative  
23 aging. We found 13 known mutation suppression genes, and 31 genes that had no previous link  
24 to spontaneous mutagenesis, and all acted independently of age. Importantly, we identified  
25 *PEX19*, encoding an evolutionarily conserved peroxisome biogenesis factor, as an age-specific  
26 mutation suppression gene. While wild-type and *pex19Δ* young cells have similar spontaneous  
27 mutation rates, aged cells lacking *PEX19* display an elevated mutation rate. This finding  
28 suggests that functional peroxisomes are important to preserve genome integrity specifically  
29 in old cells, possibly due to their role in reactive oxygen species metabolism.

## 30 **Author Summary**

31 Spontaneous mutations arise as a consequence of improper repair of DNA damage caused by  
32 intracellular (i.e. toxic by-products of normal cellular metabolism or inaccurate DNA  
33 replication) or external (e.g. UV light or chemotherapy) sources. Elevated mutagenesis is  
34 implicated in tumorigenesis, and an age-dependent accumulation of mutations has been  
35 observed in many organisms. However, it is still unclear how and at which rate mutations  
36 accumulate during aging. It is also unknown if specific mechanisms exist that protect the  
37 genome of aged cells. We developed a high-throughput, genome-wide approach to identify  
38 genes that suppress the accumulation of mutations during yeast replicative aging. Yeast  
39 replicative aging refers to the decline in viability a single cell experiences with increasing  
40 number of mitotic divisions. We identified a number of new genes that counteract the  
41 accumulation of mutations independently of age. Moreover, we discovered that *PEX19*, a gene  
42 involved in the biogenesis of peroxisomes, is important to prevent the accumulation of  
43 mutations in aged cells. Since *PEX19* is conserved in humans, our work might help understand  
44 how human cells could better protect their genome from mutations during aging.

## 45 **Introduction**

46 Genomic instability, which refers to an increased rate of accumulation of mutations and other  
47 genomic alterations, is a hallmark, and a likely driving force, of tumorigenesis [1]. Genomic  
48 instability is also a hallmark of aging [2], as suggested by the age-related accumulation of  
49 mutations observed in yeast, flies, mice and humans [3], and highlighted by the fact that defects  
50 in DNA repair pathways result in human premature aging diseases [4]. However, whether  
51 genome instability has a causative role in aging is still controversial [3], and it is not known if  
52 aged cells rely more heavily on specific genome maintenance pathways.

53 *Saccharomyces cerevisiae* is a convenient model to study genomic instability and its  
54 relationship with aging, since genome maintenance pathways are evolutionary conserved [5,6]  
55 and a large number of genetic assays have been developed to study DNA repair and  
56 mutagenesis in budding yeast [6,7]. Furthermore, most aging-related cellular pathways, as well  
57 as lifespan-modulating environmental and genetic interventions, show a remarkable degree of  
58 conservation from yeast to mammals [8–10]. There are two main *S. cerevisiae* aging models:  
59 replicative aging refers to the decline in viability that a cell experiences with increasing number  
60 of mitotic divisions (a model for aging of mitotically active cells), while chronological aging  
61 refers to the decline in viability of a non-dividing cell as a function of time (a model for aging  
62 of post-mitotic cells) [11].

63 To identify genes and pathways involved in mutagenesis during yeast replicative aging,  
64 two main challenges need to be overcome. First, while *S. cerevisiae* is a leading model system  
65 for genetic and genomic studies and the availability of the yeast deletion collection makes this  
66 model organism particularly amenable for genome-wide genetic screens [12,13], cellular  
67 processes involving low-frequency events, such as point mutations, recombination events or  
68 gross chromosomal rearrangements, pose a specific technical challenge, since these events are  
69 barely detectable with standard genome-wide screening methods [14]. In a pioneering study,

70 Huang and colleagues performed a genome-wide screen for yeast genes that suppress the  
71 accumulation of spontaneous mutations in young cells by screening patches of large numbers  
72 of cells on solid media [15]. Patches of each strain of the deletion collection were replica-plated  
73 on media containing canavanine to detect canavanine-resistant ( $\text{Can}^R$ ) colonies arising from  
74 spontaneous mutations at the *CAN1* locus. A similar approach was subsequently used in other  
75 screens for genes controlling genome integrity [5,16–18]. This strategy has proven to be  
76 effective but is extremely laborious. To overcome these limitations, we developed a screening  
77 strategy to detect low-frequency events, based on high-throughput replica pinning of high-  
78 density arrays of yeast colonies.

79         The second challenge to identify genes involved in mutagenesis during yeast replicative  
80 aging is the isolation aged cells, since they constitute a tiny fraction of an exponentially  
81 growing cell population. To allow the study of a cohort of aging mother cells, Lindstrom and  
82 Gottschling developed the Mother Enrichment Program (MEP), an inducible genetic system  
83 that prevents the proliferation of daughter cells (Fig 1A) [19]. Upon activation by estradiol, the  
84 Cre recombinase, which is under the control of a daughter-specific promoter, enters the nucleus  
85 and disrupts two genes essential for cell cycle progression (namely *UBC9* and *CDC20*),  
86 resulting in an irreversible arrest of daughter cells in G2/M, while mother cells are unaffected.  
87 Thus, in the absence of estradiol, MEP cells grow exponentially and form normal colonies on  
88 an agar plate, while upon addition of estradiol, linear growth occurs and microcolonies are  
89 formed. Occasionally, due to spontaneous mutations, the MEP is inactivated and cells become  
90 insensitive to estradiol: these cells are called “escapers” [19]. Escaper cells grow exponentially  
91 and form normal sized colonies even in the presence of estradiol.

92         We combined the MEP system with a high-throughput replica-pinning strategy to  
93 perform a genome-wide screen aimed at identifying genes important to suppress the  
94 accumulation of spontaneous mutations in replicatively aging yeast cells, using escaper

95 formation as a readout for spontaneous mutagenesis events. With our approach, we identified  
96 several new mutation suppression genes that act independently of age. We also found that  
97 *PEX19*, involved in peroxisome biogenesis, is an age-specific mutation suppression gene:  
98 while wild-type and *pex19Δ* young cells have similar spontaneous mutation rates, the absence  
99 of *PEX19* causes an elevated mutation rate specifically in old cells. We suggest that functional  
100 peroxisomes protect the genome of aged cells from spontaneous mutagenesis.

## 101 **Results**

### 102 **A high-throughput screen to identify genes important for suppressing spontaneous** 103 **mutations during yeast replicative aging**

104 We developed a high-throughput replica-pinning strategy that enables detection of low-  
105 frequency events and used it to perform a genome-wide screen for genes important for  
106 suppressing spontaneous mutations during yeast replicative aging (Fig 1). We introduced the  
107 MEP system into the yeast knockout (YKO) collection via Synthetic Genetic Array (SGA)  
108 technology [20]. The resulting MEP-YKO collection was pinned multiple times in parallel on  
109 estradiol-containing plates (18 replicates per knockout strain) to activate the MEP, and grown  
110 for one week (Fig 1C). An example of our experimental setting is shown in Fig 1B. If at any  
111 time during aging a MEP-inactivating mutation occurs, an escaper colony is formed. Each plate  
112 was then re-pinned on estradiol and grown for two days to detect escapers (escaper test). At  
113 this point, all MEP-proficient mother cells that have exhausted their replicative potential are  
114 not able to give rise to a colony; conversely, if escaper cells are present, a fully grown colony  
115 can be observed (Fig 1B and C). Our high-throughput replica-pinning method allows the semi-  
116 quantitative estimation of spontaneous mutation rates on the basis of escaper formation (Fig  
117 1C). Since every plate of the MEP-YKO collection was pinned multiple times in parallel on  
118 estradiol, it is possible to calculate the frequency of escaper formation for each deletion mutant  
119 strain in the collection: an increased escaper frequency compared to wild-type control strains  
120 is an indication of a high spontaneous mutation rate (Fig 1D).

121 To validate our assumption that the escaper frequency of each strain is a proxy for the  
122 spontaneous mutation rate, we could make use of the fact that 72 strains from the YKO  
123 collection were derived from a parental strain carrying an additional mutation in the mismatch  
124 repair gene *MSH3* and are therefore expected to show increased spontaneous mutation rates,  
125 independently of the identity of the knockout gene [21]. In addition, 340 empty positions

126 randomly dispersed over the 14 plates of the MEP-YKO library were manually filled in with a  
127 wild-type MEP control. In Fig 1D, an overview of the escaper frequencies of the whole MEP-  
128 YKO collection is shown. Most of the strains have an escaper frequency between 10% and  
129 40% (median: 27.8%). The wild-type control strains show a similar behavior (median: 22.2%),  
130 but with the important difference that the wild-type escaper frequency never exceeds 72.2%.  
131 In contrast, the escaper frequency of most of the *msh3* strains falls between 50% and 80%  
132 (median: 55.6%), validating the rationale of our screening method.

133 We then used Cutoff Linked to Interaction Knowledge (CLIK) analysis [22] to  
134 determine the cutoff for validation in an unbiased manner. The CLIK algorithm identified an  
135 enrichment of highly interacting genes at the top of our list (ranked according to escaper  
136 frequency), confirming the overall high quality of our screen (Fig 1E). The cutoff suggested  
137 by CLIK corresponds to an escaper frequency of 75%, which, not surprisingly, is slightly  
138 higher than the maximum escaper frequency observed in the wild-type controls (72.2%). To  
139 further explore the overall quality of the screen, we set the cutoff at 75% escaper frequency  
140 and performed phenotypic enrichment analysis using ScreenTroll, which examines the  
141 similarity between genome-scale screens [23]. Predictably, the first overlap with our gene list  
142 is the mutator screen performed by Huang and colleagues [15]. Furthermore, most of the top  
143 overlapping screens are related to genome instability and DNA damage sensitivity (S1 Table).  
144 Based on the threshold determined by CLIK, we proceeded to direct validation of all hits with  
145 an escaper frequency higher than 75%.

146

### 147 **Identification of new genes that suppress the accumulation of mutations independently** 148 **of replicative age**

149 We first discarded as false positive all hits where the escaper-causing mutation(s) had occurred  
150 before the beginning of the aging experiment (i.e. during the generation of the MEP-YKO



151 library and before the subsequent high-throughput replica-pinning step) as in these cases, an  
152 escaper frequency of 100% is not an indication of an extremely high mutation rate. By spotting  
153 serial dilutions of strains from the MEP-YKO library on estradiol-containing plates (S1 Fig),  
154 we found that 25/115 hits had escaped before the actual screen started (S1 File). We then set  
155 out to validate the remaining 90 putative mutator strains.

156 Spontaneous mutations can occur at any moment of the replicative lifespan and our  
157 experimental design does not allow us to discriminate if a high escaper frequency is an  
158 indication of an increased mutation rate already in young cells, or of an elevated age-dependent  
159 accumulation of mutations. To distinguish between these two possibilities, we performed  
160 fluctuation tests to measure the forward mutation rate at the endogenous *CANI* locus, where  
161 any type of mutation that inactivates the *CANI* gene confers canavanine resistance [24,25].  
162 Since fluctuation tests are performed with logarithmically growing cultures, they measure the  
163 spontaneous mutation rate in an age-independent fashion (i.e. in young cells). Twelve of our  
164 hits had been previously validated [15], and therefore were not re-tested. Several genes  
165 identified in the aforementioned study (namely *CSM2*, *SHU1*, *TSA1* and *SKN7*) fell just below  
166 our 75% escaper frequency cutoff (S1 File). Importantly, we validated 13 new mutator mutants.  
167 Our screening strategy thus enabled us to identify new genes important for the suppression of  
168 spontaneous mutations independently of replicative age. The 26 genes whose deletion results  
169 in an increased *CANI* mutation rate of at least 1.8-fold compared to wild type are listed in  
170 Table 1. We named this group of genes “general mutation suppression genes” because the  
171 corresponding knockout strains, besides showing an elevated escaper frequency in our  
172 screening setup, also display an increased mutation rate when tested in young cells with a  
173 second assay for spontaneous mutagenesis at a different genetic locus. Of the general mutation  
174 suppression genes identified, 16/26 have one or more human orthologs. As expected, these

175 genes are significantly enriched for Gene Ontology categories related to DNA damage  
 176 response, DNA repair and recombination (Fig 2 and S2 File).

177 **Table 1. List of validated general mutation suppression genes.**

|    | <b>Gene deleted</b>   | <b>Can<sup>R</sup> rate (x 10<sup>-7</sup>)</b> | <b>Function</b>                                | <b>Human ortholog(s)<sup>a</sup></b> |
|----|-----------------------|-------------------------------------------------|------------------------------------------------|--------------------------------------|
| 1  | <i>RAD27</i>          | 167.1 <sup>#</sup>                              | DNA replication and repair                     | <i>FEN1, GEN1</i>                    |
| 2  | <i>PMS1</i>           | 79.9 <sup>#</sup>                               | mismatch repair                                | <i>PMS1, PMS2</i>                    |
| 3  | <i>MSH2</i>           | 64.9 <sup>#</sup>                               | mismatch repair                                | <i>MSH2</i>                          |
| 4  | <i>MLH1</i>           | 53.0 <sup>#</sup>                               | mismatch repair                                | <i>MLH1</i>                          |
| 5  | <i>MME1</i>           | 45.1 <sup>#</sup>                               | magnesium ion export from mitochondrion        |                                      |
| 6  | <i>RAD54</i>          | 37.9 <sup>#</sup>                               | recombinational repair                         | <i>ATRX, RAD54B, RAD54L, RAD54L2</i> |
| 7  | <i>RAD57</i>          | 37.2 <sup>#</sup>                               | recombinational repair                         | <i>XRCC3</i>                         |
| 8  | <i>RAD55</i>          | 35.8 <sup>#</sup>                               | recombinational repair                         |                                      |
| 9  | <i>MPH1</i>           | 29.5 <sup>b</sup>                               | error-free bypass of DNA lesions               | <i>FANCM</i>                         |
| 10 | <i>MSH6</i>           | 27.7 <sup>#</sup>                               | mismatch repair                                | <i>MSH6</i>                          |
| 11 | <b><i>YGL177W</i></b> | 27.6                                            | dubious open reading frame (ovlp <i>MPT5</i> ) |                                      |
| 12 | <b><i>CRS5</i></b>    | 23.6                                            | copper-binding metallothionein                 |                                      |
| 13 | <b><i>VMA6</i></b>    | 22.5                                            | V-ATPase                                       | <i>ATP6V0D1, ATP6V0D2</i>            |
| 14 | <b><i>GRX7</i></b>    | 21.7                                            | oxidative stress response                      |                                      |
| 15 | <i>PSY3</i>           | 20.4 <sup>#</sup>                               | error-free DNA lesion bypass                   |                                      |
| 16 | <i>OGG1</i>           | 17.6 <sup>#</sup>                               | DNA repair                                     | <i>OGG1</i>                          |
| 17 | <i>SHU2</i>           | 17.4 <sup>#</sup>                               | error-free DNA lesion bypass                   |                                      |
| 18 | <i>NAT3</i>           | 17.0                                            | NatB N-terminal acetyltransferase              | <i>NAA20</i>                         |
| 19 | <b><i>APL1</i></b>    | 16.3                                            | vesicle mediated transport                     |                                      |
| 20 | <b><i>MET18</i></b>   | 8.1                                             | Fe-S cluster assembly                          | <i>MMS19</i>                         |
| 21 | <b><i>YLR358C</i></b> | 8.0                                             | unknown (ovlp <i>RSC2</i> )                    |                                      |
| 22 | <b><i>DSS4</i></b>    | 5.4                                             | post-Golgi vesicle-mediated transport          |                                      |
| 23 | <b><i>RLF2</i></b>    | 5.2                                             | chromatin assembly complex                     | <i>CHAF1A</i>                        |
| 24 | <b><i>SRP40</i></b>   | 5.0                                             | preribosome assembly or transport              | <i>NOLC1</i>                         |
| 25 | <b><i>NUP84</i></b>   | 4.9                                             | nuclear pore complex                           | <i>NUP107</i>                        |
| 26 | <b><i>RAD10</i></b>   | 4.9                                             | DNA repair                                     | <i>ERCC1</i>                         |
|    | Wild type             | 2.6                                             |                                                |                                      |

178  
 179 Genes in **bold** were newly identified; genes in regular font were previously identified [15,26]  
 180 # values from Huang et al. [15]; all other values were determined as described in the Materials  
 181 and Methods and are statistically supported (Student's t-test)

182 <sup>a</sup> Human orthologs of yeast genes are taken from the "S. cerevisiae to human ortholog pairs"  
 183 tool from the Rothstein Lab Tool Suite  
 184 ([http://www.rothsteinlab.com/tools/scerevisiae\\_hsapien\\_orthologs](http://www.rothsteinlab.com/tools/scerevisiae_hsapien_orthologs))

185 <sup>b</sup> An elevated mutation rate for this mutant has been previously reported [26]

186

187 We then determined whether the 64 strains that do not show an elevated mutation rate  
188 at the *CANI* locus would display an increase in the mutation rate if measured by escaper  
189 formation in the MEP genetic background. To do so, we performed a slightly modified version  
190 of the fluctuation test, where selective (i.e. estradiol-containing) plates are incubated for seven  
191 days and colonies are counted after two and seven days. Escaper colonies appearing after two  
192 days of incubation originate from mutations occurring prior to plating (i.e. in young cells),  
193 while all colonies appearing between day 2 and day 7 originate from a mutation event that  
194 occurred during replicative aging (see Materials and Methods for details). This experimental  
195 setup mimics the conditions in which the initial screen was performed and allows us to  
196 simultaneously measure the escaper formation rates in young cells and the age-dependent  
197 escaper formation frequencies. With this assay we identified 18 genes whose deletion results  
198 in an increased escaper formation rate of at least 1.8-fold compared to the wild type,  
199 independently of replicative age (i.e. based on colonies counted at day 2). We named these  
200 genes “MEP-specific mutation suppression genes”, since the spontaneous mutation rate  
201 measured at the *CANI* locus in the corresponding knockout mutants is indistinguishable from  
202 the wild type (Table 2). About half (8/18) of these genes have one or more human orthologs.  
203 Intriguingly, MEP-specific mutation suppression genes are enriched for members of the  
204 THO/TREX complex, which is involved in co-transcriptional mRNA export from the nucleus.  
205 This process is important in the interplay between transcriptional elongation and R-loop  
206 formation in yeast and mammalian cells [27,28] (Fig 3 and S2 File).

207 **Table 2. List of validated MEP-specific mutation suppression genes**

|   | <b>Gene deleted</b> | <b>Escaper rate (x 10<sup>-7</sup>)<sup>a</sup></b> | <b>Function</b>                      | <b>Human ortholog(s)<sup>b</sup></b>      |
|---|---------------------|-----------------------------------------------------|--------------------------------------|-------------------------------------------|
| 1 | <i>XRNI</i>         | 84.1                                                | exoribonuclease                      | <i>XRNI</i>                               |
| 2 | <i>COS10</i>        | 54.6                                                | turnover of plasma membrane proteins |                                           |
| 3 | <i>NIP100</i>       | 52.1                                                | dynactin complex                     | <i>CEP350, CLIP1, CLIP2, CLIP3, CLIP4</i> |
| 4 | <i>RPPIA</i>        | 34.4                                                | ribosomal protein                    | <i>RPLP1</i>                              |

|    |                |      |                                      |                         |
|----|----------------|------|--------------------------------------|-------------------------|
| 5  | <i>FMP45</i>   | 29.7 | mitochondrial membrane protein       |                         |
| 6  | <i>RPL13B</i>  | 26.3 | ribosomal protein                    | <i>RPL13</i>            |
| 7  | <i>HOP2</i>    | 25.2 | meiosis                              |                         |
| 8  | <i>SAC3</i>    | 17.1 | mRNA export (TREX complex)           | <i>MCM3AP, SAC3DI</i>   |
| 9  | <i>HBT1</i>    | 14.2 | polarized cell morphogenesis         |                         |
| 10 | <i>NFT1</i>    | 12.2 | putative ABC transporter             |                         |
| 11 | <i>SNF2</i>    | 7.9  | SWI/SNF chromatin remodeling complex | <i>SMARCA2, SMARCA4</i> |
| 12 | <i>MFT1</i>    | 7.6  | mRNA export (THO complex)            |                         |
| 13 | <i>GTO3</i>    | 7.6  | glutathione transferase              |                         |
| 14 | <i>THP1</i>    | 7.2  | mRNA export (TREX complex)           |                         |
| 15 | <i>SEMI</i>    | 6.1  | mRNA export / proteasome regulation  | <i>SHFMI</i>            |
| 16 | <i>YPL205C</i> | 6.0  | dubious open reading frame           |                         |
| 17 | <i>THP2</i>    | 5.9  | mRNA export (THO/TREX complex)       |                         |
| 18 | <i>UBA4</i>    | 5.6  | thio-modification of tRNA            | <i>MOCS3, UBA5</i>      |
|    | Wild type      | 2.9  |                                      |                         |

208

209 <sup>a</sup> All values shown are statistically supported (Student's *t*-test)

210 <sup>b</sup> Human orthologs of yeast genes are taken from the "*S. cerevisiae* to human ortholog pairs"

211 tool from the Rothstein Lab Tool Suite

212 ([http://www.rothsteinlab.com/tools/scerevisiae\\_hsapien\\_orthologs](http://www.rothsteinlab.com/tools/scerevisiae_hsapien_orthologs))

213

### 214 ***PEX19* suppresses age-dependent accumulation of mutations**

215 At the end of our validation pipeline, we were left with four gene knockout strains that display

216 no significant increase in forward mutation rate at the *CANI* locus and in escaper formation

217 rate in young cells (colonies counted at day 2) but show a higher age-dependent escaper

218 frequency compared to wild type (colonies counted at day 7) (S2 Table). We were particularly

219 interested in these genes, since our observations might indicate an age-dependent mutator

220 phenotype. To validate these putative age-specific mutator mutants with an independent and

221 more accurate method, we mechanically isolated young and aged mother cells by biotinylation

222 and magnetic sorting and measured mutation frequencies at the *CANI* locus in both cell

223 populations [29]. Based on the Can<sup>R</sup> frequencies in young cells, the replicative age (assessed

224 by bud scar counting), and the mutation rate in young cells (previously determined by

225 fluctuation test), we could calculate the expected Can<sup>R</sup> frequencies in aged cells under the

226 assumption that the mutation rate remains constant during replicative aging (see Materials and

227 Methods for details). By comparing the observed and the expected frequencies, it becomes  
228 clear if the mutation rate of a given strain is constant or varies as cells age.

229 To establish a reference, we tested wild type cells. Strikingly, the observed mutation  
230 frequency in aged cells (replicative age ~17) was lower than expected (Fig 4B and S2 Fig),  
231 suggesting a decrease in the spontaneous mutation rate during replicative aging. We then  
232 measured mutation frequencies in young and old cells from the four putative age-specific  
233 mutator strains. After the first test, three of these strains did not show any increase in age-  
234 dependent mutation frequency compared to the wild type and were therefore discarded as false  
235 positives (S3 Fig and S2 Fig). Conversely, age-dependent mutation frequency in the absence  
236 of *PEX19* was higher than in the wild type. We therefore repeated the test and confirmed that  
237 *pex19* $\Delta$  aged cells (replicative age ~15.5) display much higher mutation frequencies than  
238 expected (Fig 4 and S2 Fig). This result suggests that *PEX19*, encoding an evolutionarily  
239 conserved factor required for peroxisome biogenesis [30], suppresses age-dependent  
240 accumulation of mutations. We observed a similar effect after the deletion of *PEX3*, which  
241 causes the same peroxisome biogenesis defect as observed in the absence of *PEX19*, namely  
242 lack of detectable peroxisomal structures [31]. Mutation frequency in aged *pex3* $\Delta$  cells  
243 (replicative age ~13) was much higher than expected (S4 Fig), supporting the notion that  
244 functional peroxisomes contribute to genome maintenance during yeast replicative aging.

## 245 **Discussion**

246 *S. cerevisiae* is an outstanding model in which to perform genetic screens. However, there has  
247 been a lack of genome-wide, high-throughput screening techniques to detect low-frequency  
248 events (such as point mutations, recombination events and gross chromosomal  
249 rearrangements). These technical limitations, in combination with the difficulty to isolate large  
250 populations of replicative old cells, have so far hindered the study of genome maintenance  
251 during replicative aging.

252

### 253 **Potential applications of the high-throughput replica-pinning methodology**

254 We developed a high-throughput replica-pinning approach to screen for cellular processes  
255 involving low-frequency events, thus filling a technological gap in the yeast screening field.

256 We applied this strategy to screen for genes controlling the accumulation of spontaneous  
257 mutations during yeast replicative aging, using the Mother Enrichment Program both as a tool  
258 to induce replicative aging and as a reporter for spontaneous mutation events (Fig 1). Key  
259 technical adjustments (see Material and Methods) were: a) the use of 1536 format pads to pin  
260 the MEP-YKO collection in 384 format on estradiol, so that a smaller number of cells ( $\sim 1.5 \times$   
261  $10^4$ ) was deposited on the plate, to prevent nutrient limitation during replicative aging; b) the  
262 MEP-YKO collection amplification by parallel high-throughput replica-pinning to analyze 18  
263 colonies per strain; c) the one-week incubation time, which allowed accumulation of  
264 spontaneous mutations throughout replicative lifespan. In this way, we were able to monitor  
265 enough cell divisions to detect low-frequency mutation events. Furthermore, the analysis of 18  
266 independent colonies allowed the use of escaper frequency as a proxy for the spontaneous  
267 mutation rate. Bioinformatic analysis and experimental confirmation indicated the high quality  
268 of the screen, thus validating our methodology.

269 It is worth noting that, even independently of the MEP and the replicative aging  
270 perspective, a similar high-throughput replica-pinning approach can be used to screen for genes  
271 involved in other genome stability-related processes. For instance, we recently applied this  
272 strategy to study spontaneous homologous recombination events (manuscript in preparation).  
273 Similarly, our replica-pinning strategy could be adapted to screen for genes controlling genome  
274 integrity in the chronological lifespan model [32,33]. More generally, this technique can be  
275 used to study any process involving low-frequency events for which genetically selectable  
276 reporters exist or can be developed. Examples include transient (loss of) gene silencing [34],  
277 transcription errors [35] and read-through at premature termination codons [36].

278

#### 279 **New general mutation suppression genes identified**

280 Our screening setup was designed to allow simultaneous identification of age-independent and  
281 age-specific mutator mutants. We identified 13 new genes that suppress the accumulation of  
282 spontaneous mutations at the *CAN1* locus independently of age (Table 1). Some of these  
283 general mutation suppression genes (*RADIO* and *NUP84*) have defined roles in genome  
284 integrity [37–39]. For some other well-characterized genes, their role in preventing  
285 accumulation of mutations can be inferred from their molecular function. For instance, *MET18*  
286 has a conserved role in iron-sulfur (Fe/S) cluster assembly and insertion in several proteins  
287 involved in DNA replication and repair [40–42]. *RLF2/CAC1* encodes the largest subunit of  
288 the Chromatin Assembly Factor-I (CAF-1) complex, for which a role in DNA replication and  
289 repair of UV-induced DNA damage has been described [43–47].

290 For another group of new mutation suppression genes (*VMA6*, *GRX7*, *CRS5*, *NAT3*),  
291 their role in preventing accumulation of mutations might be more indirect. *VMA6* encodes a  
292 subunit of the evolutionary conserved vacuolar H<sup>+</sup>-ATPase (V-ATPase), responsible for  
293 vacuole acidification and cellular pH regulation [48,49]. Defects in yeast V-ATPase result in

294 vacuole alkalinization and increased cytoplasm acidification [50], mitochondrial  
295 depolarization and fragmentation [51,52], altered iron homeostasis [53] and chronic  
296 endogenous oxidative stress [54]. This phenotype could potentially explain the elevated  
297 spontaneous mutation rate of a *vma6Δ* mutant, due to compromised functioning of Fe/S cluster-  
298 containing DNA replication and repair proteins as a consequence of mitochondrial  
299 depolarization [42,55], and/or to DNA damage caused by increased endogenous oxidative  
300 stress [56]. It would be interesting to test if disruption of other V-ATPase subunits causes the  
301 same mutator phenotype.

302         The *CRS5* gene product is a copper- and zinc- binding metallothionein [57,58]. The  
303 role of Crs5 in preventing spontaneous mutations is likely linked to its protective role against  
304 endogenous oxidative stress, since scavenging of reactive oxygen species is a general function  
305 of metallothioneins [59]. Crs5 might also directly protect DNA from copper-induced cleavage  
306 [60]. The reported physical interaction between Crs5 and the peroxiredoxins Tsa1 and Tsa2,  
307 responsible for preventing DNA damage and genome instability due to hydrogen peroxide and  
308 organic peroxides generated during normal cell metabolism, further supports a role for Crs5 in  
309 protecting the genome from oxidative damage [61,62].

310         Of particular interest is the mutation suppression genes *NAT3*, encoding the catalytic  
311 subunit of the conserved NatB N-terminal acetyltransferase. *NAT3* was identified in a screen  
312 for radiation sensitive mutants, and thereafter named *RAD56* [63,64]. Importantly, its human  
313 homologue hNAT3 has been implicated in carcinogenesis [65,66]. Non-degradative protein N-  
314 acetylation occurs co-translationally and can modulate protein folding, protein localization and  
315 protein-protein interactions [67]. It is likely that Nat3 prevents the accumulation of  
316 spontaneous mutations by ensuring the proper functioning of one (or more) of its targets.  
317 Interestingly, among the identified substrates of yeast NatB, several are involved in DNA  
318 metabolism, such as Pol31, Rnr4, Sml1, Nup84 [68–70]. Furthermore, many other factors



319 involved in DNA processing and repair contain the peptide sequence recognized by NatB and  
320 are thus potential targets of Nat3 [71]. Further work will be needed to identify the relevant  
321 target(s) for preventing accumulation of spontaneous mutations.

322 *GRX7* encodes a largely uncharacterized glutaredoxin localized in the cis-Golgi  
323 [72,73]. How the disulfide bond-reducing activity of Grx7 in the Golgi affects spontaneous  
324 mutation rate is unclear, even though functional links between the Golgi apparatus and genome  
325 maintenance mechanisms have been suggested [74,75]. The *DSS4* gene product functions in  
326 the post-Golgi secretory pathway, while *APLI* is involved in clathrin-mediated vesicle  
327 transport. The elevated spontaneous mutation rate of *dss4Δ* and *apliΔ* strains may indicate a  
328 thus far unanticipated connection between genome stability and vesicle transport in the  
329 secretory pathway. The remaining genes (*YGL177W*, *YLR358C*, and *SRP40*) are poorly  
330 characterized and require further investigation.

331

### 332 **MEP-specific age-independent mutation suppression genes are enriched for genes related** 333 **to mRNA export**

334 We also identified 18 mutants that, despite an undetectable increase in the spontaneous  
335 mutation rate at the *CAN1* locus, display an age-independent elevated escaper formation rate  
336 (Table 2). This observation hints at a locus-specific increase in mutagenesis for this group of  
337 mutator strains. The observation that MEP-specific mutation suppression genes are enriched  
338 for genes involved in mRNA export from the nucleus (Fig 3 and S2 File) suggests the  
339 involvement of R-loop-dependent genome instability [27,28]. R-loops form preferentially at  
340 specific genomic locations and can cause genomic instability by exposing single-stranded  
341 DNA tracts, triggering hyper-recombination and interfering with DNA replication [76].  
342 Intriguingly, the exoribonuclease encoded by *XRNI*, our top MEP-specific mutation  
343 suppression gene, has also been implicated in preventing R-loop-dependent genome instability

344 [77]. To confirm this hypothesis, one would need to examine the genomic features of the locus  
345 or loci where mutations that give rise to escapers happen. It is assumed that escaper-originating  
346 mutations occur at the *cre-EBD78* locus (since inactivating the Cre recombinase results in a  
347 disruption of the MEP system), but the creators of the MEP already suggested that this is not  
348 always the case, and other unknown endogenous loci might be involved in escaper formation  
349 [19]. Indeed, our genetic analysis of a few escapers originating from a wild-type MEP strain  
350 showed that the escaper phenotype does not always co-segregate with the *cre-EBD78* locus,  
351 confirming that mutations occurring at other genomic loci can result in MEP inactivation and  
352 escaper formation (S3 Table).

353

#### 354 **A decrease in the spontaneous mutation rate in aged yeast cells**

355 To investigate age-dependent spontaneous mutagenesis, we first compared mutation  
356 frequencies at the *CANI* locus in young and old wt cells. Interestingly, *CANI* mutation  
357 frequencies in aged cells are lower than predicted, indicating that spontaneous mutation rate  
358 decreases during replicative aging (Fig 4B). This might occur, for instance, if the efficiency of  
359 a mutagenic DNA repair pathway, such as translesion synthesis [78], is reduced in old cells.  
360 The same effect would be observed if an error-free repair pathway is upregulated during aging.  
361 A similar decrease in the spontaneous mutation rate at the *CANI* endogenous locus has been  
362 previously reported, although the same study suggested that this effect could be locus-specific  
363 [29].

364

#### 365 **A role for peroxisomes in suppressing age-dependent accumulation of spontaneous** 366 **mutations**

367 To better understand age-dependent mutagenesis, our screen aimed at identifying genes—if  
368 they exist—that prevent accumulation of spontaneous mutations specifically in old cells. We

369 showed that *PEX19* is one of these genes, since its deletion has no effect on mutagenesis in  
370 young cells, but causes an elevated accumulation of mutations in aged cells (Fig 4). To our  
371 knowledge, this is the first described case of an age-dependent mutation suppression gene,  
372 suggesting that some cellular pathways are particularly important in protecting the genome of  
373 old cells.

374 *PEX19* is an evolutionary conserved gene which plays a key role in peroxisome  
375 biogenesis, and whose absence results in the lack of detectable peroxisomes [30,31]. Deletion  
376 of *PEX3*, another peroxisome biogenesis gene, causes the same age-specific mutator phenotype  
377 (S4 Fig), implying that functional peroxisomes are important to prevent age-dependent  
378 accumulation of mutations. The human orthologs of *PEX19* and *PEX3*, together with other  
379 peroxins, are mutated in Zellweger syndrome, a severe cerebro-hepato-renal peroxisome  
380 biogenesis disorder [79]. Peroxisomes are key organelles for the maintenance of the redox  
381 balance of the cell. On the one hand, they generate H<sub>2</sub>O<sub>2</sub> as a consequence of fatty acid  
382 peroxidation; on the other hand, they contain a set of antioxidant enzymes and function  
383 therefore as reactive oxygen species (ROS) scavenging organelles [80]. Interestingly, loss of  
384 Pex19 in *D. melanogaster* causes ROS accumulation and mitochondrial damage, and a mouse  
385 model of Zellweger syndrome displays a similar phenotype [81,82]. Elevated endogenous ROS  
386 are known to induce genome instability [83,84].

387 How could peroxisomes potentially contribute to genome integrity maintenance in aged  
388 yeast cells? Several studies report an asymmetric ROS distribution between mother and  
389 daughter cell, resulting in ROS accumulation during replicative aging [85–87]. These elevated  
390 ROS levels are accompanied by an age-dependent hyperoxidation and inactivation of the  
391 peroxiredoxin Tsa1, a key antioxidant enzyme important for genome integrity and for  
392 suppression of mutations [15,62,83,84,88]. In this context, the role of peroxisomes in  
393 protecting the genome from endogenous oxidative stress might become crucial, due to the age-

394 dependent increase in ROS accumulation and the concomitant progressive failure of other  
395 redundant antioxidant systems that are active in young cells. Our observations suggest that  
396 deletion of *PEX19* has a synergistic effect with age, resulting in elevated spontaneous  
397 mutagenesis. Given the evolutionary conservation of this and many other peroxisome  
398 biogenesis factors, it would be interesting to test the contribution of peroxisomes in genome  
399 maintenance during mammalian cell aging and cancer development. Indeed, several studies  
400 have reported the absence of peroxisomes in cancer cells [89–91], suggesting a possible link  
401 between peroxisome biogenesis defects and tumorigenesis [92].

## 402 Materials and Methods

### 403 Yeast strains and growth conditions

404 Standard yeast media and growth conditions were used [93,94]. All yeast strains used in this  
 405 study are derivatives of the BY4741 genetic background [95] and are listed in Table 3. DNY34  
 406 was obtained from Y7092 and UCC8773 by crossing and tetrad dissection. The *ice2Δ::kanMX*  
 407 strain from the deletion collection (EUROSCARF) strain was crossed with strain UCC8774 by  
 408 standard yeast genetics to create the strain DNY80. Strains DNY99, DNY101, DNY102 and  
 409 DNY105 were constructed by standard PCR-mediated gene deletion in strain UCC8773.

410

411 **Table 3. Yeast strains used in this study.**

| Strain name | Relevant genotype                                                                                                                                 | Source     |
|-------------|---------------------------------------------------------------------------------------------------------------------------------------------------|------------|
| BY4741      | <i>MATa his3Δ1 leu2Δ0 ura3Δ0 met15Δ0</i>                                                                                                          | [95]       |
| UCC8773     | <i>MATa his3Δ1 leu2Δ0 ura3Δ0 lys2Δ0 hoΔ::Pscw11-cre-EBD78-natMX loxP-CDC20-intron-loxP-hphMX loxP-UBC9-loxP-LEU2</i>                              | [96]       |
| UCC8774     | <i>MATα his3Δ1 leu2Δ0 ura3Δ0 trp1Δ63 hoΔ::Pscw11-cre-EBD78-natMX loxP-CDC20-intron-loxP-hphMX loxP-UBC9-loxP-LEU2</i>                             | [96]       |
| Y7092       | <i>MATα his3Δ1 leu2Δ0 ura3Δ0 can1Δ::STE2pr-Sp_his5 lyp1Δ met15Δ0</i>                                                                              | [97]       |
| DNY34       | <i>MATα his3Δ1 leu2Δ0 ura3Δ0 can1Δ::STE2pr-Sp_his5 lyp1Δ met15Δ0 hoΔ::PSCW11-cre-EBD78-natMX loxP-UBC9-loxP-LEU2 loxP-CDC20-Intron-loxP-hphMX</i> | This study |
| DNY80       | <i>MATa his3Δ1 leu2Δ0 ura3Δ0 lys2Δ0 met15Δ0 hoΔ::Pscw11-cre-EBD78-natMX loxP-CDC20-intron-loxP-hphMX loxP-UBC9-loxP-LEU2 ice2Δ::kanMX</i>         | This study |

|        |                                                                                                                                            |            |
|--------|--------------------------------------------------------------------------------------------------------------------------------------------|------------|
| DNY99  | <i>MATa his3Δ1 leu2Δ0 ura3Δ0 lys2Δ0 met15Δ0 hoΔ::Pscw11-cre-EBD78-natMX loxP-CDC20-intron-loxP-hphMX loxP-UBC9-loxP-LEU2 pex19Δ::kanMX</i> | This study |
| DNY101 | <i>MATa his3Δ1 leu2Δ0 ura3Δ0 lys2Δ0 met15Δ0 hoΔ::Pscw11-cre-EBD78-natMX loxP-CDC20-intron-loxP-hphMX loxP-UBC9-loxP-LEU2 rox3Δ::kanMX</i>  | This study |
| DNY102 | <i>MATa his3Δ1 leu2Δ0 ura3Δ0 lys2Δ0 met15Δ0 hoΔ::Pscw11-cre-EBD78-natMX loxP-CDC20-intron-loxP-hphMX loxP-UBC9-loxP-LEU2 atg23Δ::kanMX</i> | This study |
| DNY105 | <i>MATa his3Δ1 leu2Δ0 ura3Δ0 lys2Δ0 met15Δ0 hoΔ::Pscw11-cre-EBD78-natMX loxP-CDC20-intron-loxP-hphMX loxP-UBC9-loxP-LEU2 pex3Δ::kanMX</i>  | This study |

412

413

#### 414 **High-throughput replica-pinning screen**

415 High-throughput manipulation of high-density yeast arrays was performed with the RoToR-  
416 HDA pinning robot (Singer Instruments). The Mother Enrichment Program (MEP) was  
417 introduced into the *MATa* yeast deletion collection (EUROSCARF) through Synthetic Genetic  
418 Array (SGA) methodology [97] using the DNY34 query strain. The procedure was performed  
419 twice in parallel to generate two independent sets of MEP yeast deletion arrays in 384-colony  
420 format. When a specific MEP mutant was missing in one of the arrays, it was manually pinned  
421 over from the other set. Positions that were empty in both sets were filled with *his3Δ::kanMX*  
422 control strains, unless they were kept empty for plate identification purposes. Colonies from  
423 the two sets of MEP yeast deletion arrays were pinned onto YPD + G418 plates and incubated  
424 for six hours at 30°C. Each plate of each set was then pinned onto nine YPD plates containing  
425 1 μM estradiol (18 replicates in total). At this step, colonies were pinned in 384 format using  
426 1536 format pads, so that a smaller number of cells was deposited to prevent nutrient limitation.

427 Plates were incubated for seven days at 30°C and then scanned with a flatbed scanner.  
428 Subsequently, each plate was pinned onto one YPD plate containing 1 μM estradiol and  
429 incubated for two days at 30°C before scanning (“escaper test”). Colony area measurement  
430 was performed using the ImageJ software package [98] and the ImageJ plugin ScreenMill  
431 Colony Measurement Engine [99], to assess colony circularity and size in pixels. The data was  
432 filtered to exclude artifacts by requiring a colony circularity score greater than 0.8. Colonies  
433 with a pixel area greater than 200 were considered escapers, and for each deletion strain, the  
434 ratio of escapers to total colonies in replica pinning experiments was used as the escaper  
435 frequency score.

436

#### 437 **Screen validation pipeline**

438 Putative hits were initially analyzed by fluctuation test to measure the forward mutation rate at  
439 the endogenous *CANI* locus. To do so, we used the strains from the YKO collection, because  
440 the strains from the MEP-YKO collection are *can1Δ*. At first, we performed one fluctuation  
441 test per strain. If the mutation rate was higher than 1.5-fold of the wild-type mutation rate, the  
442 test was repeated another two or three times.

443 For all the genes whose deletion does not cause an increase in the mutation rate at the  
444 *CANI* locus, the corresponding knockout strains from the MEP-YKO collection were analyzed  
445 by fluctuation test to measure the escaper formation rate in young cells and the escaper  
446 formation frequency in replicatively aged cells. At first, we performed one fluctuation test per  
447 strain. If the escaper formation rate was higher than 1.5-fold of the wild-type escaper formation  
448 rate, the test was repeated another two or three times. In case no increase in escaper formation  
449 rate was detected but elevated age-dependent escaper formation frequencies were observed,  
450 the experiment was repeated another one or two times.

451 Strains that consistently displayed an elevated age-dependent escaper formation  
452 frequency were further validated by construction of a new knockout strain in a MEP *CANI*  
453 background and by direct measurement of spontaneous mutation frequencies at the *CANI* locus  
454 in young and aged cells. Each knockout strain was tested once. If the age-dependent mutation  
455 frequencies were not higher than the wild-type control, the strain was discarded as a false  
456 positive; if the age-dependent mutation frequencies were increased compared to the wild-type  
457 control, the experiment was repeated three times.

458 The identity of all validated strains from the YKO and MEP-YKO collections was  
459 confirmed by barcode sequencing as previously described [100].

460

#### 461 **Measurements of the spontaneous forward mutation rate at the *CANI* locus**

462 Single colonies were inoculated in 5 ml YPD and grown up to saturation (two days at 30°C).  
463 100 µl were plated onto canavanine-containing SD medium (50 µg/ml) to identify forward  
464 mutations in *CANI* and 50 µl of a 10<sup>5</sup>-fold dilution was plated onto SD medium to count viable  
465 cells. Colonies were counted after two days of growth at 30°C and the spontaneous forward  
466 mutation rate at the *CANI* locus was determined by fluctuation test from nine independent  
467 cultures using the method of the median [25,101]. Values represent the average of at least three  
468 independent experiments.

469

#### 470 **Measurements of spontaneous escaper formation rate and age-dependent escaper** 471 **formation frequencies**

472 Single colonies were inoculated in 5 ml YPD and grown up to saturation (two days at 30°C).  
473 50 µl of a 50-fold dilution (or a higher dilution, when needed) were plated onto YPD plates  
474 containing 1 µM estradiol to identify escaper occurrence in young cells (“young plates”), 50 µl  
475 of a 500-fold dilution (or a higher dilution, when needed) were plated onto YPD plates



476 containing 1  $\mu$ M estradiol to identify escapers occurrence in aging cells (“old plates”), and 50  
477  $\mu$ l of a 500000-fold dilution was plated onto YPD plates to count viable cell number. Colonies  
478 were counted after two days of growth at 30°C (for “young plates” and YPD plates) or after  
479 two and after seven days of growth at 30°C (for “old plates”). In “young plates”, colonies that  
480 were smaller than the colonies growing on the corresponding YPD plate were not counted,  
481 because for those colonies the escaper-causing mutation occurred after plating. The  
482 spontaneous escaper formation rate in young cells was determined by fluctuation test from 7-  
483 10 independent cultures using the MSS-maximum-likelihood estimator method from the  
484 FALCOR fluctuation analysis calculator [102]. Values represent the average of at least three  
485 independent experiments. Age-dependent escaper formation frequencies was calculated by  
486 dividing the number of escaper colonies that appeared between day 2 and day 7 (on “old  
487 plates”) by the number of viable cells plated (determined from the YPD plates).

488

#### 489 **Measurements of spontaneous mutation frequencies at the *CANI* locus in young and aged** 490 **cells**

491 Isolation of young and aged cells was performed essentially as previously described [19,103].  
492  $1.5 \times 10^9$  cells from a log-phase MEP culture were washed with cold phosphate buffered saline  
493 (PBS), resuspended in cold PBS containing 7 mg/ml Sulfo-NHS-LC-Biotin (Thermo  
494 Scientific) and incubated for 20 min at room temperature with gentle shaking. Biotinylated  
495 cells were then washed with PBS, resuspended in 250 ml of pre-warmed YPD medium and  
496 allowed to recover for 2 h at 30°C with shaking. Estradiol was added to a final concentration  
497 of 1  $\mu$ M to induce the MEP (aging starts here). After 2 h of incubation at 30°C with shaking,  
498 100 ml were harvested (young cells), while the rest of the culture (150 ml) was inoculated in a  
499 total volume of 1 L YPD containing 1  $\mu$ M estradiol and 100  $\mu$ g/ml ampicillin (to discourage  
500 bacterial contamination), and incubated at 30°C with shaking. Young cells were washed with

501 cold PBS, resuspended in 5 ml cold PBS and incubated with 100  $\mu$ l streptavidin-coated BioMag  
502 beads (Qiagen) in a 5 ml LoBind tube (Eppendorf) at 4°C with gentle shaking for 30 min. Cells  
503 were gently pelleted at 4°C (3 min 1800  $\times$  g), resuspended in 7 ml cold YPD and transferred  
504 to a glass test tube (Lab Logistics Group). The tube was placed in a magnet ("The Big Easy"  
505 EasySep Magnet, Stemcell Technologies) for 5 min on ice. Cells were then washed three times  
506 by removing supernatant by pipetting, resuspending them in 7 ml cold YPD and incubating for  
507 5 min on ice in the magnet. Finally, cells were resuspended in 5.2 ml PBS and transferred in a  
508 5 ml LoBind tube (Eppendorf). Of the 5.2 ml of purified mother cells, 100  $\mu$ l were stained for  
509 bud scars counting (see below); 100  $\mu$ l were diluted 1000x and plated on SD medium to assess  
510 cell viability; the remaining 5 ml were pelleted and plated on canavanine-containing SD  
511 medium (50  $\mu$ g/ml) to identify forward mutations in *CANI*. After 20 h of MEP induction, the  
512 entire aged 1 L culture was harvested. The aged cells were processed similarly to the young  
513 cells, with slight modifications because of the higher number of cells due to the presence of  
514 daughter cells. For beading, the cells were split into 4 different 5 ml LoBind tubes, and 50  $\mu$ l  
515 streptavidin coated BioMag beads were added to each tube. For magnetic sorting, two glass  
516 tubes were used and cells were washed four times.

517 For both young and aged samples, colonies were counted after 2 d of growth at 30°C  
518 and the spontaneous forward mutation frequencies at the *CANI* locus were determined.  
519 Expected mutation frequencies in aged cells were calculated as previously described [29].

520

### 521 **Bud scar detection and counting**

522 Purified mother cells (see above) were stained with propidium iodide (PI) (Sigma) to identify  
523 viable cells and with Calcofluor White (Fluorescent Brightener 28, Sigma) to detect bud scars.  
524 100  $\mu$ l of purified mother cells in PBS ( $\sim 5 \times 10^5$  cells) were stained with 2  $\mu$ l of a 2 mM PI  
525 (Sigma) solution for 30 min at 30°C. Cells were then washed with ddH<sub>2</sub>O, fixed in 500  $\mu$ l of

526 3.7% formaldehyde for 30 min at room temperature, washed with PBS, resuspended in 100  $\mu$ l  
527 PBS and stored at 4°C. Just before imaging, cells were stained with Calcofluor White for 5 min  
528 at room temperature, washed with PBS and resuspended in 5-10  $\mu$ l PBS. Images were acquired  
529 using a DeltaVision Elite imaging system (Applied Precision (GE), Issaquah, WA, USA)  
530 composed of an inverted microscope (IX-71; Olympus) equipped with a Plan Apo 100X oil  
531 immersion objective with 1.4 NA, InsightSSITM Solid State Illumination, excitation and  
532 emission filters for DAPI and A594, ultimate focus and a CoolSNAP HQ2 camera  
533 (Photometrics, Tucson, AZ, USA). Stacks of 30 images with 0.2  $\mu$ m spacing were taken at an  
534 exposure time of 5 ms at 10% intensity for DAPI (Calcofluor White staining) and 50 ms at  
535 32% intensity for A594 (PI staining). Reference bright-field images were also taken.  
536 Fluorescent images were subjected to 3D deconvolution using SoftWoRx 5.5 software  
537 (Applied Precision). Processing of all images was performed using Fiji (ImageJ, National  
538 Institute of Health) [98]. Bud scars from at least 50 PI-negative cells (which were alive after  
539 magnetic sorting) were manually counted for each sample to determine the cells' replicative  
540 age.

541

#### 542 **Gene Ontology enrichment analysis and functional annotation**

543 GO enrichment analysis was performed with DAVID 6.8 (<https://david.ncifcrf.gov/home.jsp>)  
544 using the Functional Annotation tool [104,105]. To reduce functional redundancy among GO  
545 terms, we used the REVIGO Web server (<http://revigo.irb.hr/>) with a cutoff value  $C = 0.5$   
546 [106].

547 Functional enrichment within the yeast global genetic similarity network was performed and  
548 visualized with TheCellMap.org (<http://thecellmap.org/>), using SAFE [107,108].

549 **Acknowledgments**

550 We thank Marlien Visser for helping with the fluctuation tests and Grant W. Brown for  
551 critically reading the manuscript.

## 552 **References**

- 553 1. Hanahan D, Weinberg RA. Hallmarks of cancer: the next generation. *Cell*. 2011;144:  
554 646–674. doi:10.1016/j.cell.2011.02.013
- 555 2. López-Otín C, Blasco MA, Partridge L, Serrano M, Kroemer G. The hallmarks of aging.  
556 *Cell*. 2013;153: 1194–1217. doi:10.1016/j.cell.2013.05.039
- 557 3. Moskalev AA, Shaposhnikov M V., Plyusnina EN, Zhavoronkov A, Budovsky A, Yanai  
558 H, et al. The role of DNA damage and repair in aging through the prism of Koch-like  
559 criteria. *Ageing Res Rev*. 2013;12: 661–684. doi:10.1016/j.arr.2012.02.001
- 560 4. Carrero D, Soria-Valles C, López-Otín C. Hallmarks of progeroid syndromes: lessons  
561 from mice and reprogrammed cells. *Dis Model Mech*. 2016;9: 719–735.  
562 doi:10.1242/dmm.024711
- 563 5. Putnam CD, Srivatsan A, Nene R V, Martinez SL, Clotfelter SP, Fonseca F, et al. A  
564 genetic network that suppresses genome rearrangements in *Saccharomyces cerevisiae*  
565 and contains defects in cancers. *Nat Commun*. 2016;7: 11256.  
566 doi:10.1038/ncomms11256
- 567 6. Putnam CD, Kolodner RD. Pathways and mechanisms that prevent genome instability  
568 in *Saccharomyces cerevisiae*. *Genetics*. 2017;206: 1187–1225.  
569 doi:10.1534/genetics.112.145805
- 570 7. Symington LS, Rothstein R, Lisby M. Mechanisms and regulation of mitotic  
571 recombination in *Saccharomyces cerevisiae*. *Genetics*. 2014;198: 795–835.  
572 doi:10.1534/genetics.114.166140
- 573 8. Pitt JN, Kaeberlein M. Why is aging conserved and what can we do about it? *PLoS Biol*.  
574 2015;13: e1002131. doi:10.1371/journal.pbio.1002131
- 575 9. Fontana L, Partridge L, Longo VD. Extending healthy life span — from yeast to humans.  
576 *Science*. 2010;328: 321–326. doi:10.1126/science.1172539

- 577 10. Janssens GE, Veenhoff LM. Evidence for the hallmarks of human aging in replicatively  
578 aging yeast. *Microb Cell*. 2016;3: 263–274. doi:10.15698/mic2016.07.510
- 579 11. Denoth Lippuner A, Julou T, Barral Y. Budding yeast as a model organism to study the  
580 effects of age. *FEMS Microbiol Rev*. 2014;38: 300–325. doi:10.1111/1574-6976.12060
- 581 12. Giaever G, Nislow C. The yeast deletion collection: a decade of functional genomics.  
582 *Genetics*. 2014;197: 451–465. doi:10.1534/genetics.114.161620
- 583 13. Botstein D, Fink GR. Yeast: an experimental organism for 21st Century biology.  
584 *Genetics*. 2011;189: 695–704. doi:10.1534/genetics.111.130765
- 585 14. Chang M, Parsons AB, Sheikh B, Boone C, Brown GW. Genomic approaches for  
586 identifying DNA damage response pathways in *S. cerevisiae*. *Methods Enzymol*.  
587 2006;409: 213–235. doi:10.1016/S0076-6879(05)09013-0
- 588 15. Huang M-E, Rio A-G, Nicolas A, Kolodner RD. A genomewide screen in  
589 *Saccharomyces cerevisiae* for genes that suppress the accumulation of mutations. *Proc*  
590 *Natl Acad Sci U S A*. 2003;100: 11529–11534. doi:10.1073/pnas.2035018100
- 591 16. Smith S, Hwang J, Banerjee S, Majeed A, Gupta A, Myung K. Mutator genes for  
592 suppression of gross chromosomal rearrangements identified by a genome-wide  
593 screening in *Saccharomyces cerevisiae*. *Proc Natl Acad Sci U S A*. 2004;101: 9039–  
594 9044. doi:10.1073/pnas.0403093101
- 595 17. Zhang Y, Shishkin AA, Nishida Y, Marcinkowski-Desmond D, Saini N, Volkov K V,  
596 et al. Genome-wide screen identifies pathways that govern GAA/TTC repeat fragility  
597 and expansions in dividing and nondividing yeast cells. *Mol Cell*. 2012;48: 254–265.  
598 doi:10.1016/j.molcel.2012
- 599 18. Zhang Y, Saini N, Sheng Z, Lobachev KS. Genome-wide screen reveals replication  
600 pathway for quasi-palindrome fragility dependent on homologous recombination. *PLoS*  
601 *Genet*. 2013;9: e1003979. doi:10.1371/journal.pgen.1003979

- 602 19. Lindstrom DL, Gottschling DE. The mother enrichment program: a genetic system for  
603 facile replicative life span analysis in *Saccharomyces cerevisiae*. *Genetics*. 2009;183:  
604 413–422. doi:10.1534/genetics.109.106229
- 605 20. Tong AHY, Boone C. Synthetic genetic array analysis in *Saccharomyces cerevisiae*.  
606 *Methods Mol Biol*. 2006;313: 171–192.
- 607 21. Lehner KR, Stone MM, Farber RA, Petes TD. Ninety-six haploid yeast strains with  
608 individual disruptions of Open Reading Frames between *YOR097C* and *YOR192C*,  
609 constructed for the *Saccharomyces* Genome Deletion Project, have an additional  
610 mutation in the Mismatch Repair gene *MSH3*. *Genetics*. 2007;177: 1951–1953.  
611 doi:10.1534/genetics.107.079368
- 612 22. Dittmar JC, Pierce S, Rothstein R, Reid RJD. Physical and genetic-interaction density  
613 reveals functional organization and informs significance cutoffs in genome-wide  
614 screens. *Proc Natl Acad Sci U S A*. 2013;110: 7389–7394.  
615 doi:10.1073/pnas.1219582110
- 616 23. Thorpe PH, Dittmar JC, Rothstein R. ScreenTroll : a searchable database to compare  
617 genome-wide yeast screens. *Database (Oxford)*. 2012;2012: bas022.  
618 doi:10.1093/database/bas022
- 619 24. Reenan RAG, Kolodner RD. Characterization of insertion mutations in the  
620 *Saccharomyces cerevisiae* *MSH1* and *MSH2* genes: evidence for separate mitochondrial  
621 and nuclear functions. *Genetics*. 1992;132: 975–985.
- 622 25. Foster PL. Methods for determining spontaneous mutation rates. *Methods Enzymol*.  
623 2006;409: 195–213. doi:10.1016/S0076-6879(05)09012-9
- 624 26. Scheller J, Schürer A, Rudolph C, Hettwer S, Kramer W. *MPHI*, a yeast gene encoding  
625 a DEAH protein, plays a role in protection of the genome from spontaneous and  
626 chemically induced damage. *Genetics*. 2000;155: 1069–1081.

- 627 27. Huertas P, Aguilera A. Cotranscriptionally formed DNA:RNA hybrids mediate  
628 transcription elongation impairment and transcription-associated recombination. *Mol*  
629 *Cell*. 2003;12: 711–721. doi:10.1016/j.molcel.2003.08.010
- 630 28. Domínguez-Sánchez M, Barroso S, Gómez-González B, Luna R, Aguilera A. Genome  
631 instability and transcription elongation impairment in human cells depleted of  
632 THO/TREX. *PLoS Genet*. 2011;7: e1002386. doi:10.1371/journal.pgen.1002386
- 633 29. Patterson MN, Maxwell PH. Combining magnetic sorting of mother cells and  
634 fluctuation tests to analyze genome instability during mitotic cell aging in  
635 *Saccharomyces cerevisiae*. *J Vis Exp*. 2014;92: e51850. doi:10.3791/51850
- 636 30. Agrawal G, Subramani S. De novo peroxisome biogenesis: evolving concepts and  
637 conundrums. *Biochim Biophys Acta*. 2016;1863: 892–901.  
638 doi:10.1016/j.bbamcr.2015.09.014
- 639 31. Hettema EH, Girzalsky W, Van Den Berg M, Erdmann R, Distel B. *Saccharomyces*  
640 *cerevisiae* Pex3p and Pex19p are required for proper localization and stability of  
641 peroxisomal membrane proteins. *EMBO J*. 2000;19: 223–233.  
642 doi:10.1093/emboj/19.2.223
- 643 32. Powers III RW, Kaeberlein M, Caldwell SD, Kennedy BK, Fields S. Extension of  
644 chronological life span in yeast by decreased TOR pathway signaling. *Genes Dev*.  
645 2006;20: 174–184. doi:10.1101/gad.1381406
- 646 33. Wei M, Madia F, Longo VD. Studying age-dependent genomic instability using the *S.*  
647 *cerevisiae* chronological lifespan model. *J Vis Exp*. 2011;55: e3030. doi:10.3791/3030
- 648 34. Dodson AE, Rine J. Heritable capture of heterochromatin dynamics in *Saccharomyces*  
649 *cerevisiae*. *Elife*. 2015;4: e05007. doi:10.7554/eLife.05007
- 650 35. Gout J, Li W, Fritsch C, Li A, Haroon S, Singh L, et al. The landscape of transcription  
651 errors in eukaryotic cells. *Sci Adv*. 2017;3: e1701484. doi:10.1126/sciadv.1701484



- 652 36. Altamura E, Borgatti M, Finotti A, Gasparello J, Gambari R, Spinelli M, et al. Chemical-  
653 induced read-through at premature termination codons determined by a rapid dual-  
654 fluorescence system based on *S. cerevisiae*. PLoS One. 2016;11: e0154260.  
655 doi:10.1371/journal.pone.0154260
- 656 37. Schiestl RH, Prakash S. *RAD10*, an excision repair gene of *Saccharomyces cerevisiae*,  
657 is involved in the *RADI* pathway of mitotic recombination. Mol Cell Biol. 1990;10:  
658 2485–2491. doi:10.1128/MCB.10.6.2485
- 659 38. Bardwell AJ, Bardwell L, Tomkinson AE, Friedberg EC. Specific cleavage of model  
660 recombination and repair intermediates by the yeast Rad1-Rad10 DNA endonuclease.  
661 Science. 1994;265: 2082–2085. doi:10.1126/science.8091230
- 662 39. Freudenreich CH, Su XA. Relocalization of DNA lesions to the nuclear pore complex.  
663 FEMS Yeast Res. 2016;16: fow095. doi:10.1093/femsyr/fow095
- 664 40. Stehling O, Vashisht AA, Mascarenhas J, Jonsson ZO, Sharma T, Netz DJA, et al.  
665 MMS19 assembles iron-sulfur proteins required for DNA metabolism and genomic  
666 integrity. Science. 2012;337: 195–199. doi:10.1126/science.1219723
- 667 41. Gari K, León Ortiz MA, Borel V, Flynn H, Skehel JM, Boulton SJ. MMS19 links  
668 cytoplasmic iron-sulfur cluster assembly to DNA metabolism. Science. 2012;337: 243–  
669 245. doi:10.1126/science.1219664
- 670 42. Zhang C. Essential functions of iron-requiring proteins in DNA replication, repair and  
671 cell cycle control. Protein Cell. 2014;5: 750–760. doi:10.1007/s13238-014-0083-7
- 672 43. Kaufman PD, Kobayashi R, Stillman B. Ultraviolet radiation sensitivity and reduction  
673 of telomeric silencing in *Saccharomyces cerevisiae* cells lacking chromatin assembly  
674 factor-I. Genes Dev. 1997;11: 345–357. doi:10.1101/gad.11.3.345
- 675 44. Game JC, Kaufman PD. Role of *Saccharomyces cerevisiae* chromatin assembly factor-  
676 I in repair of ultraviolet radiation damage in vivo. Genetics. 1999;151: 485–497.

- 677 45. Smith S, Stillman B. Stepwise assembly of chromatin during DNA replication in vitro.  
678 EMBO J. 1991;10: 971–980. doi:10.1002/j.1460-2075.1991.tb08031.x
- 679 46. Zhang Z, Shibahara KI, Stillman B. PCNA connects DNA replication to epigenetic  
680 inheritance in yeast. Nature. 2000;408: 221–225. doi:10.1038/35041601
- 681 47. Moggs JG, Grandi P, Quivy J-P, Jonsson ZO, Hubscher U, Becker PB, et al. A CAF-1-  
682 PCNA-mediated chromatin assembly pathway triggered by sensing DNA damage. Mol  
683 Cell Biol. 2000;20: 1206–1218. doi:10.1128/MCB.20.4.1206-1218.2000
- 684 48. Bauerle C, Ho MN, Lindorfer MA, Stevens TH. The *Saccharomyces cerevisiae* *VMA6*  
685 gene encodes the 36-kDa subunit of the vacuolar H<sup>+</sup>-ATPase membrane sector. J Biol  
686 Chem. 1993;268: 12749–12757.
- 687 49. Kane PM. The where, when, and how of organelle acidification by the yeast vacuolar  
688 H<sup>+</sup>-ATPase. Microbiol Mol Biol Rev. 2006;70: 177–191. doi:10.1128/MMBR.70.1.177
- 689 50. Martínez-Muñoz GA, Kane P. Vacuolar and plasma membrane proton pumps  
690 collaborate to achieve cytosolic pH homeostasis in yeast. J Biol Chem. 2008;283:  
691 20309–20319. doi:10.1074/jbc.M710470200
- 692 51. Merz S, Westermann B. Genome-wide deletion mutant analysis reveals genes required  
693 for respiratory growth, mitochondrial genome maintenance and mitochondrial protein  
694 synthesis in *Saccharomyces cerevisiae*. Genome Biol. 2009;10: R95. doi:10.1186/gb-  
695 2009-10-9-r95
- 696 52. Hughes AL, Gottschling DE. An early age increase in vacuolar pH limits mitochondrial  
697 function and lifespan in yeast. Nature. 2012;492: 261–265. doi:10.1038/nature11654
- 698 53. Diab HI, Kane PM. Loss of vacuolar H<sup>+</sup>-ATPase (V-ATPase) activity in yeast generates  
699 an iron deprivation signal that is moderated by induction of the peroxiredoxin *TSA2*. J  
700 Biol Chem. 2013;288: 11366–11377. doi:10.1074/jbc.M112.419259
- 701 54. Milgrom E, Diab H, Middleton F, Kane PM. Loss of vacuolar proton-translocating

- 702 ATPase activity in yeast results in chronic oxidative stress. *J Biol Chem.* 2007;282:  
703 7125–7136. doi:10.1074/jbc.M608293200
- 704 55. Veatch JR, McMurray MA, Nelson ZW, Gottschling DE. Mitochondrial dysfunction  
705 leads to nuclear genome instability via an iron-sulphur cluster defect. *Cell.* 2009;137:  
706 1247–1258. doi:10.1016/j.cell.2009.04.014
- 707 56. Valko M, Jomova K, Rhodes CJ, Kuča K, Musílek K. Redox- and non-redox-metal-  
708 induced formation of free radicals and their role in human disease. *Arch Toxicol.*  
709 2016;90: 1–37. doi:10.1007/s00204-015-1579-5
- 710 57. Culotta VC, Howard WR, Liu XF. *CRS5* encodes a metallothionein-like protein in  
711 *Saccharomyces cerevisiae*. *J Biol Chem.* 1994;269: 25295–25302.
- 712 58. Pagani A, Villarreal L, Capdevila M, Atrian S. The *Saccharomyces cerevisiae* Crs5  
713 Metallothionein metal-binding abilities and its role in the response to zinc overload. *Mol*  
714 *Microbiol.* 2007;63: 256–269. doi:10.1111/j.1365-2958.2006.05510.x
- 715 59. Chiaverini N, De Ley M. Protective effect of metallothionein on oxidative stress-  
716 induced DNA damage. *Free Radic Res.* 2010;44: 605–613.  
717 doi:10.3109/10715761003692511
- 718 60. Cai L, Koropatnick J, Cherian MG. Metallothionein protects DNA from copper-induced  
719 but not iron-induced cleavage in vitro. *Chem Biol Interact.* 1995;96: 143–155.  
720 doi:10.1016/0009-2797(94)03585-V
- 721 61. Tio L, Pagani MA, Atrian S. *Drosophila* proteins interacting with metallothioneins: a  
722 metal-dependent recognition. *Proteomics.* 2009;9: 2568–2577.  
723 doi:10.1002/pmic.200800729
- 724 62. Iraqui I, Kienda G, Soeur J, Faye G, Baldacci G, Kolodner RD, et al. Peroxiredoxin Tsa1  
725 is the key peroxidase suppressing genome instability and protecting against cell death in  
726 *Saccharomyces cerevisiae*. *PLoS Genet.* 2009;5: e1000524.

- 727 doi:10.1371/journal.pgen.1000524
- 728 63. Game JC, Mortimer RK. A genetic study of X-ray sensitive mutants in yeast. *Mutat Res.*  
729 1974;24: 281–292. doi:10.1016/0027-5107(74)90176-6
- 730 64. Mathiasen DP, Gallina I, Germann SM, Hamou W, Eléouët M, Thodberg S, et al.  
731 Physical mapping and cloning of *RAD56*. *Gene.* 2013;519: 182–186.  
732 doi:10.1016/j.gene.2013.01.044
- 733 65. Ametzazurra A, Larrea E, Civeira MP, Prieto J, Aldabe R. Implication of human N- $\alpha$ -  
734 acetyltransferase 5 in cellular proliferation and carcinogenesis. *Oncogene.* 2008;27:  
735 7296–7306. doi:10.1038/onc.2008.332
- 736 66. Neri L, Lasa M, Elosegui-Artola A, D’Avola D, Carte B, Gazquez C, et al. NatB-  
737 mediated protein N- $\alpha$ -terminal acetylation is a potential therapeutic target in  
738 hepatocellular carcinoma. *Oncotarget.* 2017;8: 40967–40981.  
739 doi:10.18632/oncotarget.17332
- 740 67. Aksnes H, Drazic A, Marie M, Arnesen T. First things first: vital protein marks by N-  
741 terminal acetyltransferases. *Trends Biochem Sci.* 2016;41: 746–760.  
742 doi:10.1016/j.tibs.2016.07.005
- 743 68. Polevoda B, Norbeck J, Takakura H, Blomberg A, Sherman F. Identification and  
744 specificities of N-terminal acetyltransferases from *Saccharomyces cerevisiae*. *EMBO J.*  
745 1999;18: 6155–6168. doi:10.1093/emboj/18.21.6155
- 746 69. Helbig AO, Rosati S, Pijnappel PWWM, van Breukelen B, Timmers MHTH,  
747 Mohammed S, et al. Perturbation of the yeast N-acetyltransferase NatB induces  
748 elevation of protein phosphorylation levels. *BMC Genomics.* 2010;11: 685.  
749 doi:10.1186/1471-2164-11-685
- 750 70. Van Damme P, Lasa M, Polevoda B, Gazquez C, Elosegui-Artola A, Kim DS, et al. N-  
751 terminal acetylome analyses and functional insights of the N-terminal acetyltransferase

- 752 NatB. Proc Natl Acad Sci U S A. 2012;109: 12449–12454.  
753 doi:10.1073/pnas.1210303109
- 754 71. Caesar R, Warringer J, Blomberg A. Physiological importance and identification of  
755 novel targets for the N-terminal acetyltransferase NatB. Eukaryot Cell. 2006;5: 368–  
756 378. doi:10.1128/EC.5.2.368-378.2006
- 757 72. Mesecke N, Spang A, Deponte M, Herrmann JM. A novel group of glutaredoxins in the  
758 cis-Golgi critical for oxidative stress resistance. Mol Biol Cell. 2008;19: 2673–2680.  
759 doi:10.1091/mbc.E07
- 760 73. Izquierdo A, Casas C, Mühlhoff U, Lillig CH, Herrero E. *Saccharomyces cerevisiae*  
761 Grx6 and Grx7 are monothiol glutaredoxins associated with the early secretory pathway.  
762 Eukaryot Cell. 2008;7: 1415–1426. doi:10.1128/EC.00133-08
- 763 74. Farber-Katz SE, Dippold HC, Buschman MD, Peterman MC, Xing M, Noakes CJ, et al.  
764 DNA damage triggers Golgi dispersal via DNA-PK and GOLPH3. Cell. 2014;156: 413–  
765 427. doi:10.1016/j.cell.2013.12.023
- 766 75. Rodrigues J, Banks P, Lydall D. Vps74 connects the Golgi apparatus and telomeres in  
767 *Saccharomyces cerevisiae*. G3 (Bethesda). 2018;8: 1807–1816.  
768 doi:10.1534/g3.118.200172
- 769 76. Aguilera A, García-Muse T. R loops: from transcription byproducts to threats to genome  
770 stability. Mol Cell. 2012;46: 115–124. doi:10.1016/j.molcel.2012.04.009
- 771 77. Wahba L, Amon JD, Koshland D, Vuica-Ross M. RNase H and multiple RNA  
772 biogenesis factors cooperate to prevent RNA:DNA hybrids from generating genome  
773 instability. Mol Cell. 2011;44: 978–988. doi:10.1016/j.molcel.2011.10.017
- 774 78. Boiteux S, Jinks-Robertson S. DNA repair mechanisms and the bypass of DNA damage  
775 in *Saccharomyces cerevisiae*. Genetics. 2013;193: 1025–1064.  
776 doi:10.1534/genetics.112.145219

- 777 79. Fujiki Y, Yagita Y, Matsuzaki T. Peroxisome biogenesis disorders: molecular basis for  
778 impaired peroxisomal membrane assembly. *Biochim Biophys Acta*. 2012;1822: 1337–  
779 1342. doi:10.1016/j.bbadis.2012.06.004
- 780 80. Bonekamp NA, Völkl A, Fahimi HD, Schrader M. Reactive oxygen species and  
781 peroxisomes: struggling for balance. *BioFactors*. 2009;35: 346–355.  
782 doi:10.1002/biof.48
- 783 81. Bülow MH, Wingen C, Senyilmaz D, Gosejacob D, Sociale M, Bauer R, et al.  
784 Unbalanced lipolysis results in lipotoxicity and mitochondrial damage in peroxisome-  
785 deficient *Pex19* mutants. *Mol Biol Cell*. 2018;29: 396–407. doi:10.1091/mbc.E17-08-  
786 0535
- 787 82. Rahim RS, Chen M, Nourse CC, Meedeniya ACB, Crane DI. Mitochondrial changes  
788 and oxidative stress in a mouse model of Zellweger syndrome neuropathogenesis.  
789 *Neuroscience*. 2016;334: 201–213. doi:10.1016/j.neuroscience.2016.08.001
- 790 83. Huang M-E, Kolodner RD. A biological network in *Saccharomyces cerevisiae* prevents  
791 the deleterious effects of endogenous oxidative DNA damage. *Mol Cell*. 2005;17: 709–  
792 720. doi:10.1016/j.molcel.2005.02.008
- 793 84. Ragu S, Faye G, Iraqui I, Masurel-Heneman A, Kolodner RD, Huang M-E. Oxygen  
794 metabolism and reactive oxygen species cause chromosomal rearrangements and cell  
795 death. *Proc Natl Acad Sci U S A*. 2007;104: 9747–9752. doi:10.1073/pnas.0703192104
- 796 85. Erjavec N, Nyström T. Sir2p-dependent protein segregation gives rise to a superior  
797 reactive oxygen species management in the progeny of *Saccharomyces cerevisiae*. *Proc*  
798 *Natl Acad Sci U S A*. 2007;104: 10877–10881. doi:10.1073/pnas.0701634104
- 799 86. Lam YT, Aung-Htut MT, Lim YL, Yang H, Dawes IW. Changes in reactive oxygen  
800 species begin early during replicative aging of *Saccharomyces cerevisiae* cells. *Free*  
801 *Radic Biol Med*. 2011;50: 963–970. doi:10.1016/j.freeradbiomed.2011.01.013

- 802 87. McFaline-Figueroa JR, Vevea J, Swayne TC, Zhou C, Liu C, Leung G, et al.  
803 Mitochondrial quality control during inheritance is associated with lifespan and mother-  
804 daughter age asymmetry in budding yeast. *Aging Cell*. 2011;10: 885–895.  
805 doi:10.1111/j.1474-9726.2011.00731.x
- 806 88. Molin M, Yang J, Hanzén S, Toledano MB, Labarre J, Nyström T. Life span extension  
807 and H<sub>2</sub>O<sub>2</sub> resistance elicited by caloric restriction require the peroxiredoxin Tsa1 in  
808 *Saccharomyces cerevisiae*. *Mol Cell*. 2011;43: 823–833.  
809 doi:10.1016/j.molcel.2011.07.027
- 810 89. Lauer C, Völkl A, Riedl S, Fahimi HD, Beier K. Impairment of peroxisomal biogenesis  
811 in human colon carcinoma. *Carcinogenesis*. 1999;20: 985–989.  
812 doi:10.1093/carcin/20.6.985
- 813 90. Frederiks WM, Vreeling-Sindelárová H, Van Noorden CJF. Loss of peroxisomes causes  
814 oxygen insensitivity of the histochemical assay of glucose-6-phosphate dehydrogenase  
815 activity to detect cancer cells. *J Histochem Cytochem*. 2007;55: 175–181.  
816 doi:10.1369/jhc.6A7068.2006
- 817 91. Frederiks WM, Bosch KS, Hoeben KA, van Marle J, Langbein S. Renal cell carcinoma  
818 and oxidative stress: the lack of peroxisomes. *Acta Histochem*. 2010;112: 364–371.  
819 doi:10.1016/j.acthis.2009.03.003
- 820 92. Deori NM, Kale A, Maurya PK, Nagotu S. Peroxisomes: role in cellular ageing and age  
821 related disorders. *Biogerontology*. 2018;19: 303–324. doi:10.1007/s10522-018-9761-9
- 822 93. Treco DA, Lundblad V. Preparation of yeast media. *Curr Protoc Mol Biol*. 2001;Chapter  
823 13: Unit13.1. doi:10.1002/0471142727.mb1301s23
- 824 94. Sherman F. Getting started with yeast. *Methods Enzymol*. 2002;350: 3–41.  
825 doi:http://dx.doi.org/10.1016/S0076-6879(02)50954-X
- 826 95. Brachmann CB, Davies A, Cost GJ, Caputo E, Li J, Hieter P, et al. Designer deletion

- 827 strains derived from *Saccharomyces cerevisiae* S288C: a useful set of strains and  
828 plasmids for PCR-mediated gene disruption and other applications. *Yeast*. 1998;14:  
829 115–132. doi:10.1002/(SICI)1097-0061(19980130)14:2<115::AID-  
830 YEA204>3.0.CO;2-2
- 831 96. Henderson KA, Hughes AL, Gottschling DE. Mother-daughter asymmetry of pH  
832 underlies aging and rejuvenation in yeast. *Elife*. 2014;3: e03504.  
833 doi:10.7554/eLife.03504
- 834 97. Tong AHY, Boone C. High-throughput strain construction and systematic synthetic  
835 lethal screening in *Saccharomyces cerevisiae*. *Methods Microbiol*. 2007;36: 369–386,  
836 706–707. doi:10.1016/S0580-9517(06)36016-3
- 837 98. Schneider CA, Rasband WS, Eliceiri KW. NIH Image to ImageJ : 25 years of image  
838 analysis. *Nat Methods*. 2012;9: 671–675. doi:10.1038/nmeth.2089
- 839 99. Dittmar JC, Reid RJD, Rothstein R. ScreenMill: a freely available software suite for  
840 growth measurement, analysis and visualization of high-throughput screen data. *BMC*  
841 *Bioinformatics*. 2010;11: 353. doi:10.1186/1471-2105-11-353
- 842 100. Mcmahon KW, Manukyan A, Dungrawala H, Montgomery M, Nordstrom B, Wright J,  
843 et al. FASTA barcodes : a simple method for the identification of yeast ORF deletions.  
844 *Yeast*. 2011;28: 661–671. doi:10.1002/yea.1894
- 845 101. Lea DE, Coulson CA. The distribution of the numbers of mutants in bacterial  
846 populations. *J Genet*. 1949;49: 264–285.
- 847 102. Hall BM, Ma C, Liang P, Singh KK. Fluctuation AnaLysis CalculatOR (FALCOR): a  
848 web tool for the determination of mutation rate using Luria-Delbrück fluctuation  
849 analysis. *Bioinformatics*. 2009;25: 1564–1565. doi:10.1093/bioinformatics/btp253
- 850 103. Janssens GE, Meinema AC, González J, Wolters JC, Schmidt A, Guryev V, et al. Protein  
851 biogenesis machinery is a driver of replicative aging in yeast. *Elife*. 2015;4: e08527.



852 doi:10.7554/eLife.08527

853 104. Huang DW, Sherman BT, Lempicki RA. Systematic and integrative analysis of large  
854 gene lists using DAVID bioinformatics resources. *Nat Protoc.* 2009;4: 44–57.

855 doi:10.1038/nprot.2008.211

856 105. Huang DW, Sherman BT, Lempicki RA. Bioinformatics enrichment tools: paths toward  
857 the comprehensive functional analysis of large gene lists. *Nucleic Acids Res.* 2009;37:

858 1–13. doi:10.1093/nar/gkn923

859 106. Supek F, Bošnjak M, Škunca N, Šmuc T. REVIGO summarizes and visualizes long lists  
860 of Gene Ontology terms. *PLoS One.* 2011;6: e21800.

861 doi:10.1371/journal.pone.0021800

862 107. Usaj M, Tan Y, Wang W, VanderSluis B, Zou A, Myers CL, et al. TheCellMap.org: a  
863 web-accessible database for visualizing and mining the global yeast genetic interaction

864 network. *G3 (Bethesda).* 2017;7: 1539–1549. doi:10.1534/g3.117.040220

865 108. Baryshnikova A. Systematic functional annotation and visualization of biological

866 networks. *Cell Syst.* 2016;2: 412–421. doi:10.1016/j.cels.2016.04.014

867 **Figure captions**

868 **Fig 1. Combining the Mother Enrichment Program with high-throughput replica-**  
869 **pinning to screen for genes that suppress spontaneous mutations during yeast replicative**  
870 **aging.** (A) The Mother Enrichment Program (MEP). Estradiol induction causes irreversible  
871 arrest of daughter cell proliferation, while growth of mother cells is unaffected. Inactivation of  
872 the MEP due to spontaneous mutations results in estradiol-insensitive cells called escapers. (B)  
873 Escaper formation is a readout for spontaneous mutation events during replicative aging. High-  
874 density arrays of MEP colonies are pinned on estradiol and escapers are subsequently detected  
875 by re-pinning on estradiol (big colonies). (C) Schematic of the screening procedure. The MEP  
876 is introduced into the YKO collection via Synthetic Genetic Array (SGA) methodology. The  
877 resulting MEP-YKO collection is amplified by high-throughput (HT) replica-pinning on  
878 estradiol, which activates the MEP and triggers replicative aging. A second replica-pinning on  
879 estradiol allows detection of escapers (escaper test). Escaper frequencies are calculated for each  
880 strain of the MEP-YKO collection. (D) Comparison of escaper frequencies of the whole MEP-  
881 YKO collection with escaper frequencies of wt and mutator (*msh3*) controls. (E) CLIK analysis  
882 sets an unbiased cutoff for validation. Green and blue colors indicate regions of the plot  
883 significantly enriched for physical and genetic interactions, while regions deprived of  
884 significant enrichment are plotted in gray. The red dotted line marks the cutoff suggested by  
885 the CLIK algorithm.

886

887 **Fig 2. Overview of the general mutation suppression genes.** (A) Functional enrichment in  
888 the yeast genetic landscape. Dotted lines indicate functional domains within the yeast genetic  
889 landscape, i.e. gene clusters enriched for a specific set of GO terms (the name of each functional  
890 domain is indicated by a colored label). Regions of the global similarity network significantly

891 enriched for genes exhibiting genetic interactions with general mutation suppression genes  
892 were mapped using SAFE and are indicated in blue. (B) Gene Ontology enrichment analysis.

893

894 **Fig 3. Overview of the MEP-specific mutation suppression genes.** (A) Functional  
895 enrichment in the yeast genetic landscape. Regions of the global similarity network  
896 significantly enriched for genes exhibiting genetic interactions with MEP-specific mutation  
897 suppression genes were mapped using SAFE and are indicated in orange. See Legend to Fig  
898 2A for details. (B) Gene Ontology enrichment analysis.

899

900 **Fig 4. *PEX19* suppresses age-dependent accumulation of mutations.** (A) *CAN1* forward  
901 mutation rate in young wt and *pex19* $\Delta$  cells. Values from three independent experiments are  
902 plotted. The thick dark bars represent the median values. ns: non-significant. (B) Age-  
903 dependent mutation frequencies at the *CAN1* locus in wt (replicative age ~17) and *pex19* $\Delta$   
904 (replicative age ~15.5) cells. The difference between observed and expected mutation  
905 frequencies from four independent experiments is plotted. The horizontal bars represent the  
906 median values. p-value was determined by Student's *t*-test.

## 907 **Supporting information**

908 **S1 Fig. Exclusion of strains that escaped before the beginning of the screen.** When serial  
909 dilutions of strains from the MEP-YKO collection are spotted in the presence of estradiol,  
910 growth of MEP-proficient strains is restricted, while escaper strains grow normally. An  
911 example of one MEP-proficient strain and one escaper is shown.

912

913 **S2 Fig. Raw data for all the age-dependent mutation frequency measurement**  
914 **experiments.** (A) Mutation frequencies at the *CANI* locus in young and old cells from the  
915 indicated strains. In the case of old cells, both observed and expected mutation frequencies are  
916 shown. For each individual experiment, the median replicative age of the young and old cell  
917 populations is indicated. (B) Bud scars distribution of young and old cell populations from each  
918 experiment.

919

920 **S3 Fig. *ICE2*, *ATG23* and *ROX3* did not validate as age-specific mutation suppression**  
921 **genes.** (A) *CANI* forward mutation rate in young wt, *ice2* $\Delta$ , *atg23* $\Delta$ , and *rox3* $\Delta$  cells. Mean  
922 values from three independent experiments are plotted. Error bars represent standard error. ns:  
923 non-significant. (B) Age-dependent mutation frequencies at the *CANI* locus in wt (replicative  
924 age ~17), *ice2* $\Delta$  (replicative age ~15), *atg23* $\Delta$  (replicative age ~15.5), and *rox3* $\Delta$  (replicative  
925 age ~15) cells. The difference between observed and expected mutation frequency is plotted.  
926 For the wt, the mean value from four independent experiments is plotted. Error bars represent  
927 standard error. For the mutants, only one experiment is shown (see the Results and Material  
928 and Methods sections for details).

929

930 **S4 Fig. *PEX3* deletion results in elevated spontaneous mutations in aged cells.** (A) *CANI*  
931 forward mutation rate in young wt, and *pex3* $\Delta$  cells. Mean values from three or four

932 independent experiments are plotted. Error bars represent standard error. ns: non-significant.

933 (B) Age-dependent mutation frequencies at the *CANI* locus in wt (replicative age ~17), and

934 *pex3Δ* (replicative age ~13) cells. The difference between observed and expected mutation

935 frequency is plotted. For the wt, the mean value from four independent experiments is plotted.

936 Error bars represent standard error. For *pex3Δ*, only one experiment is shown.

937

938 **S1 Table. ScreenTroll phenotypic enrichment analysis.** ScreenTroll analysis

939 (<http://www.rothsteinlab.com/tools/screenTroll>) identifies overlaps between published screens

940 and our gene dataset (cutoff 75% escaper frequency, determined by CLIK). The top overlaps

941 are related to genome instability and DNA damage sensitivity. “ORFs in screen” refers to the

942 total number of hits identified in the overlapping screen.

943

944 **S2 Table. List of putative age-specific mutation suppression genes.**

945

946 **S3 Table. Escaper formation is not always caused by mutations at the *cre-EBD78* locus.**

947

948 **S1 File. Complete escaper frequency data from the screen and validation of mutation**

949 **suppression genes.**

950

951 **S2 File. SAFE enrichments and GO enrichment analysis for general and MEP-specific**

952 **mutation suppression genes.**

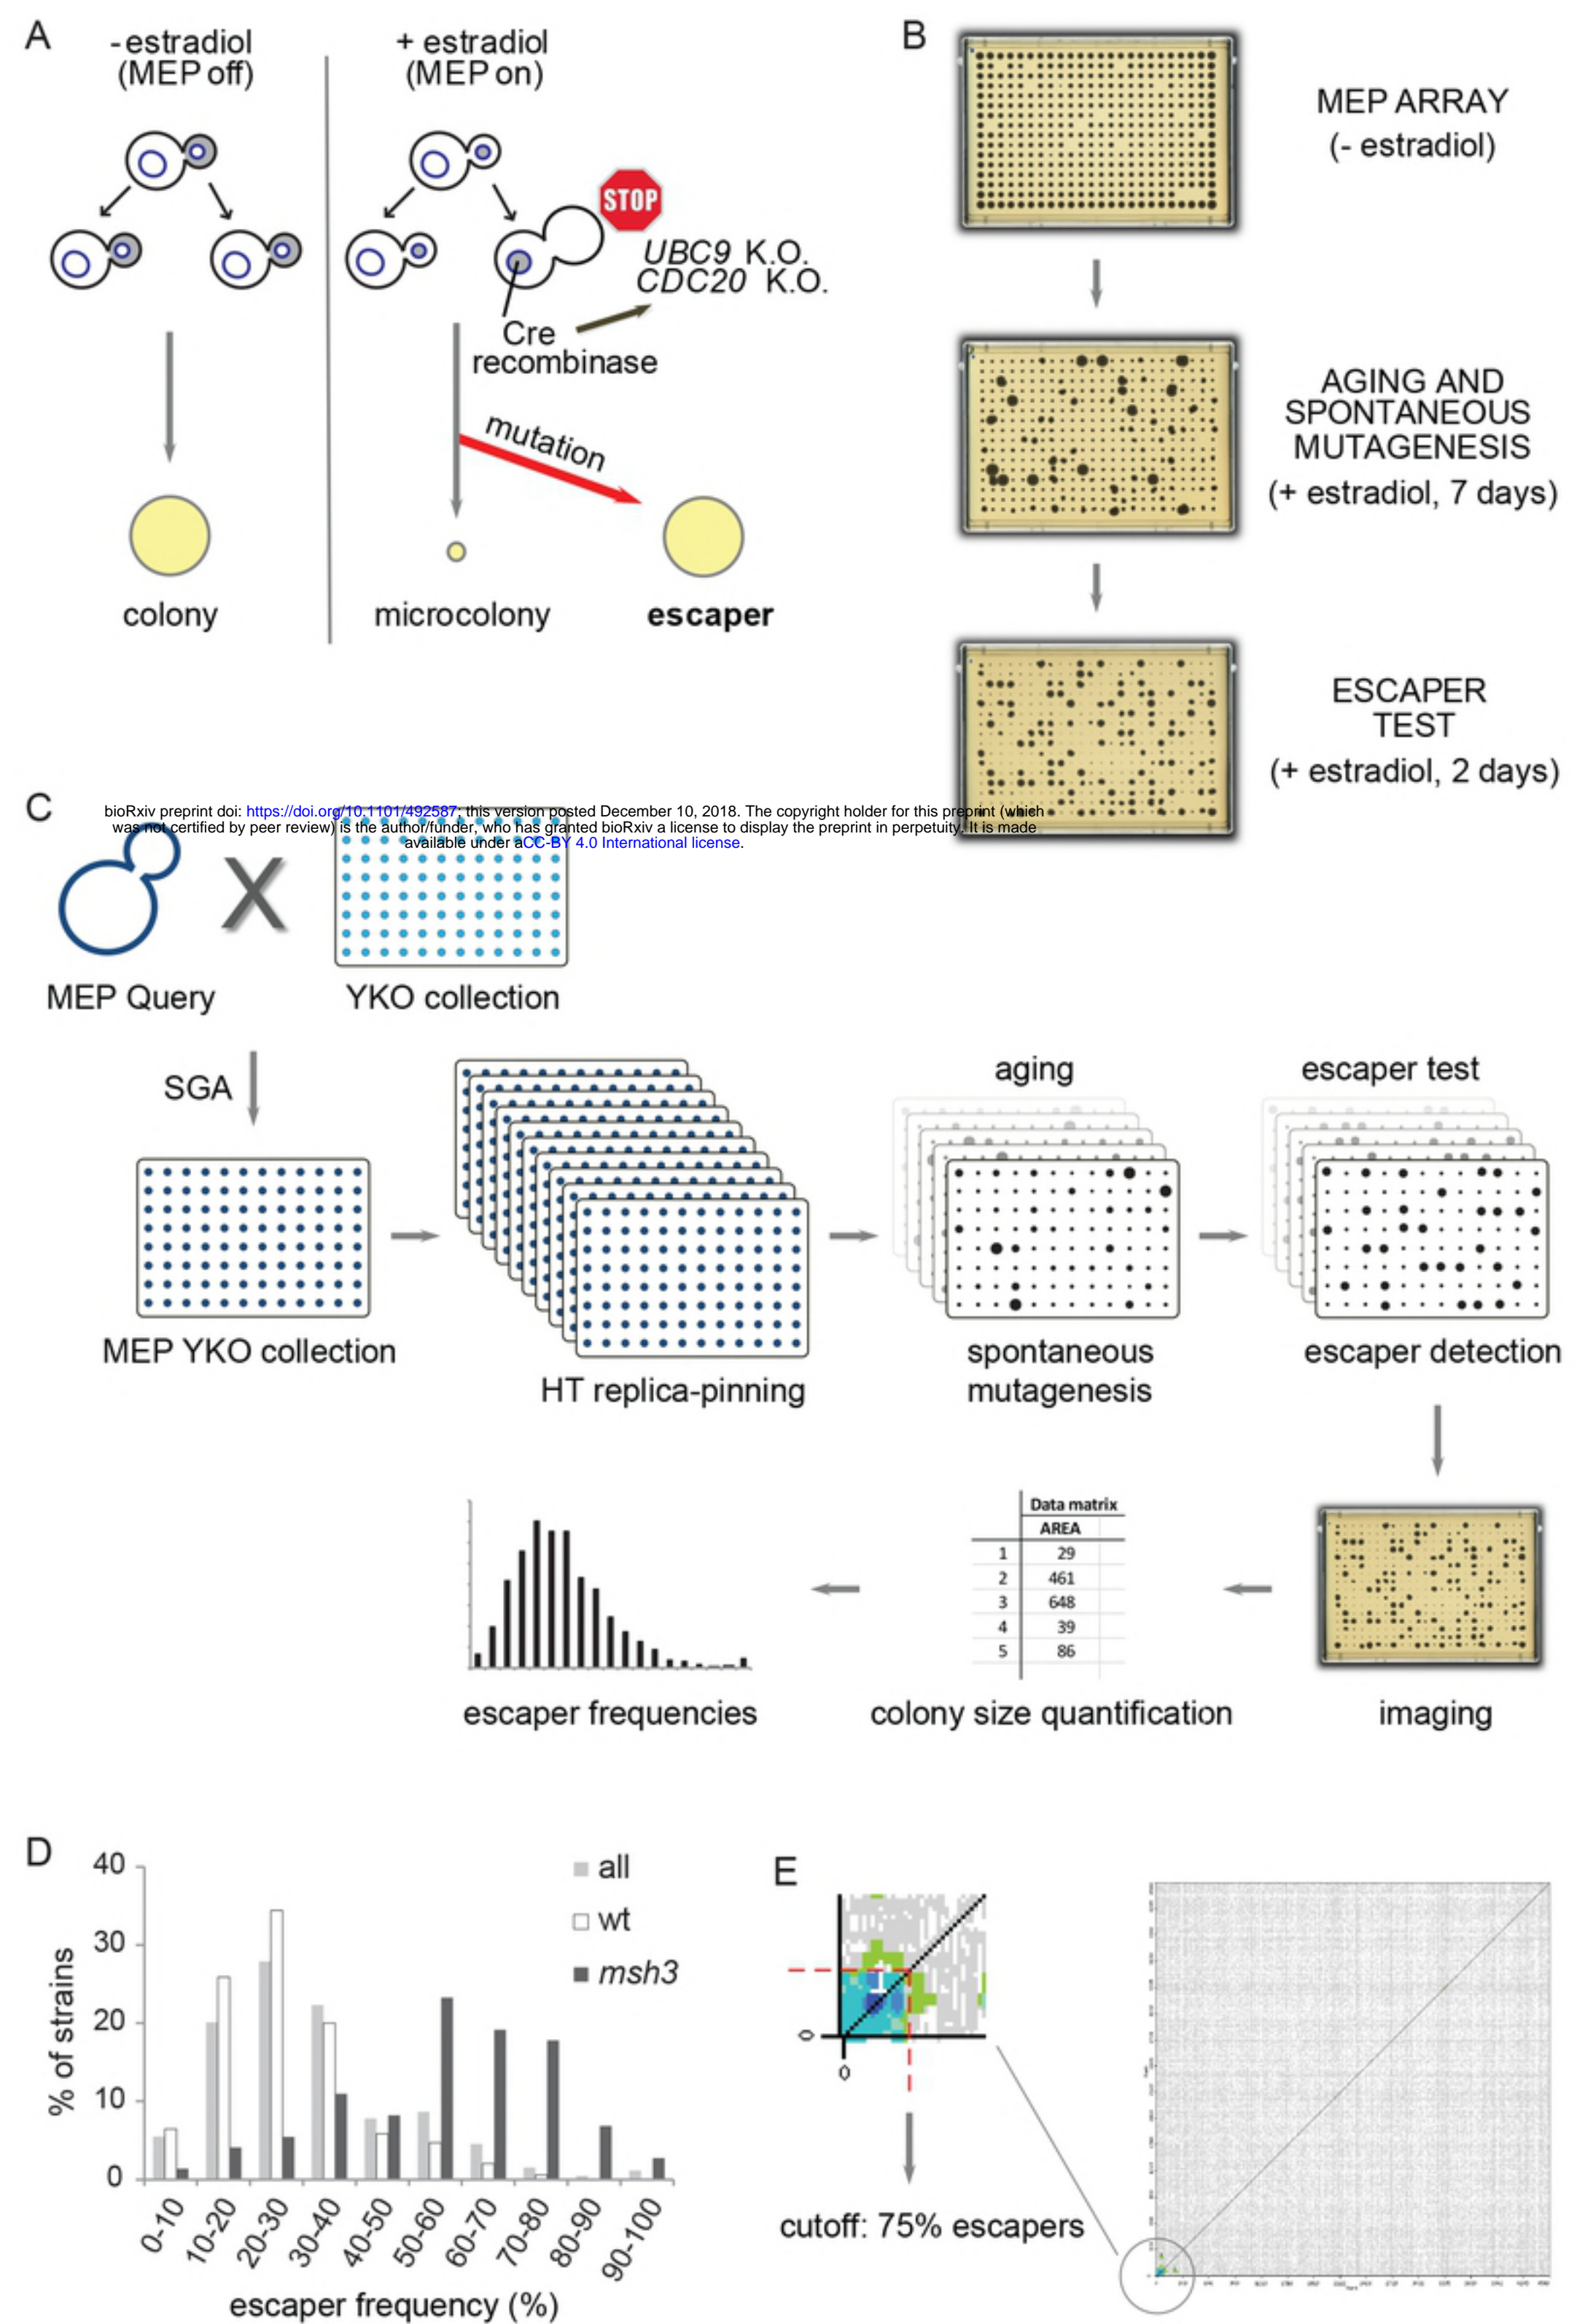

A

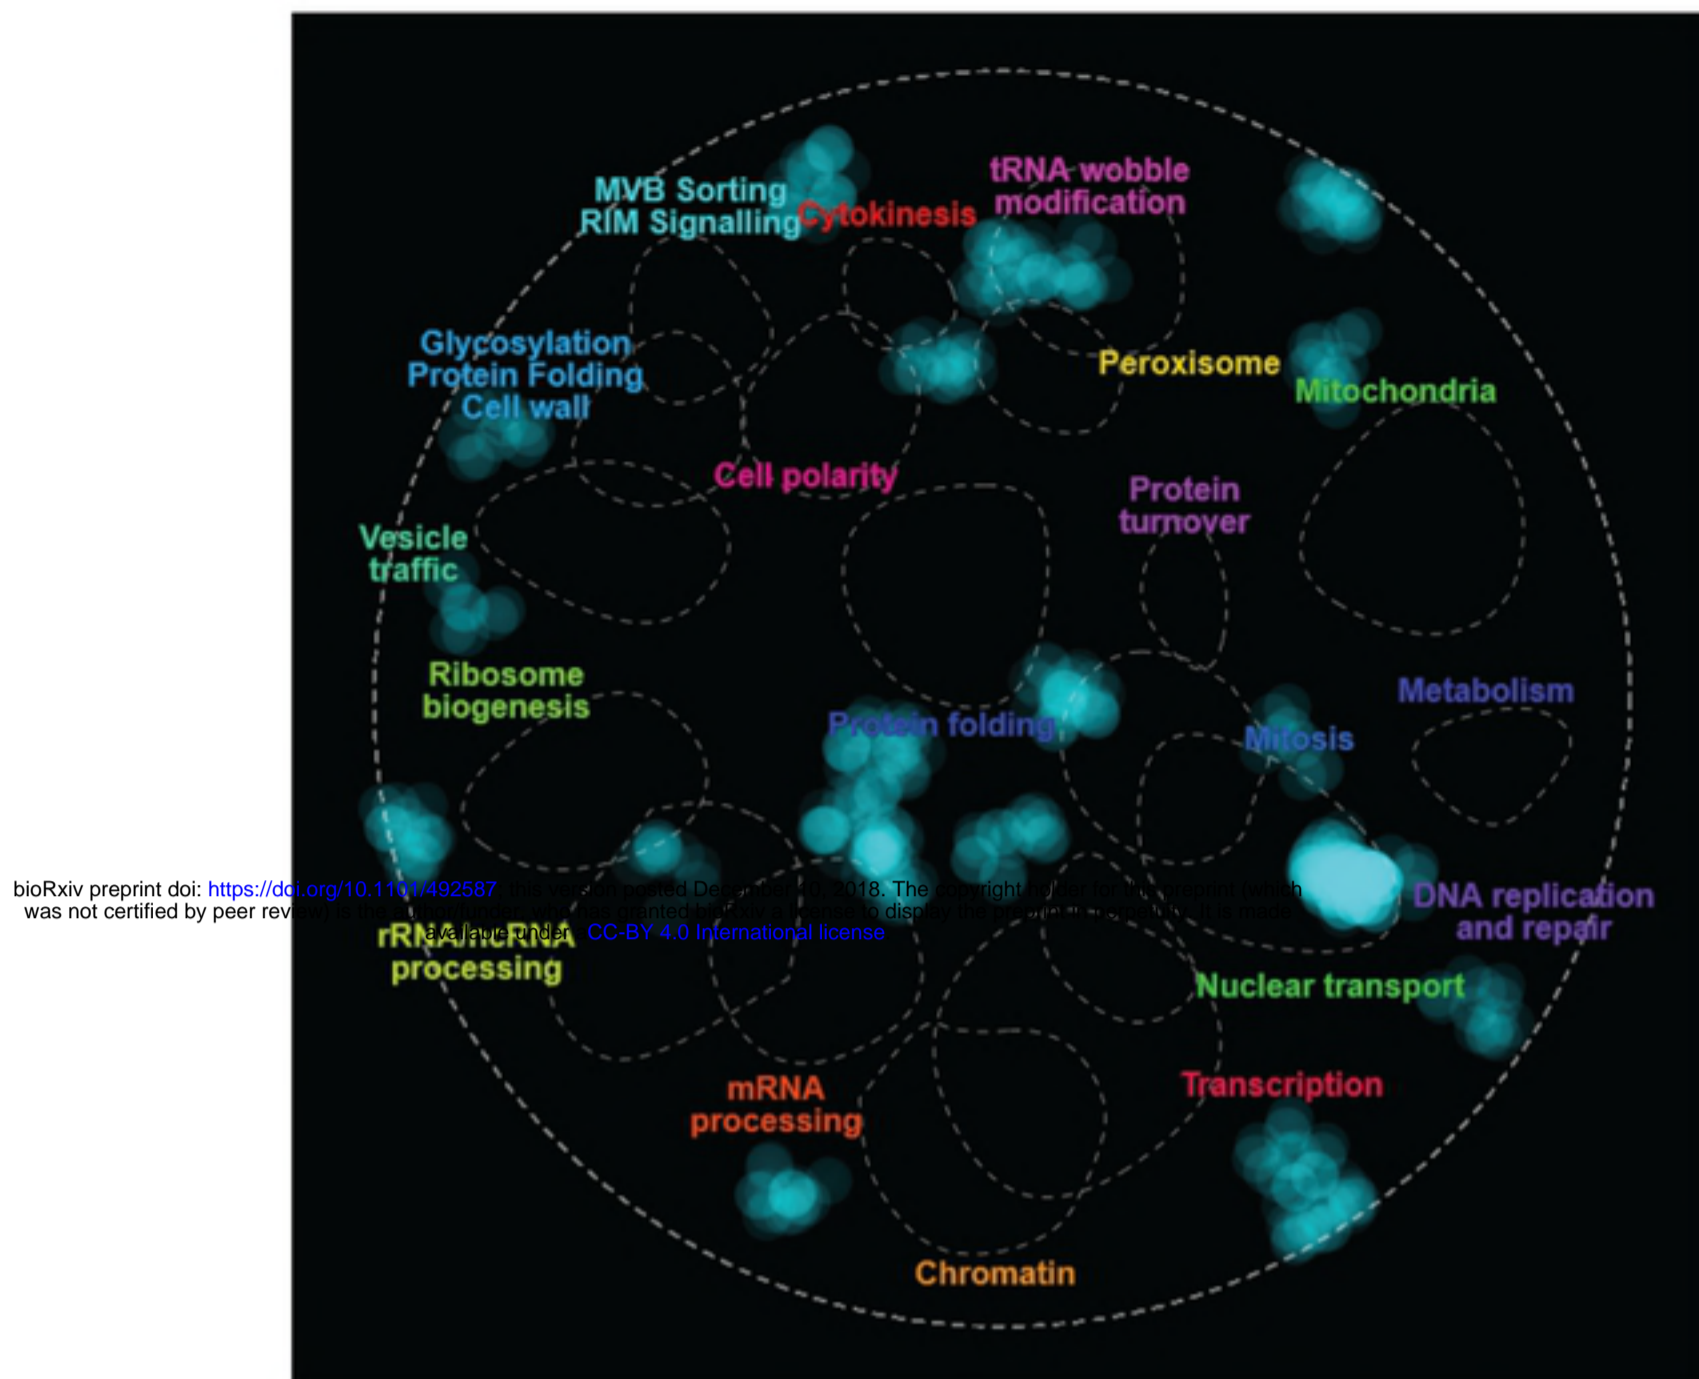

B

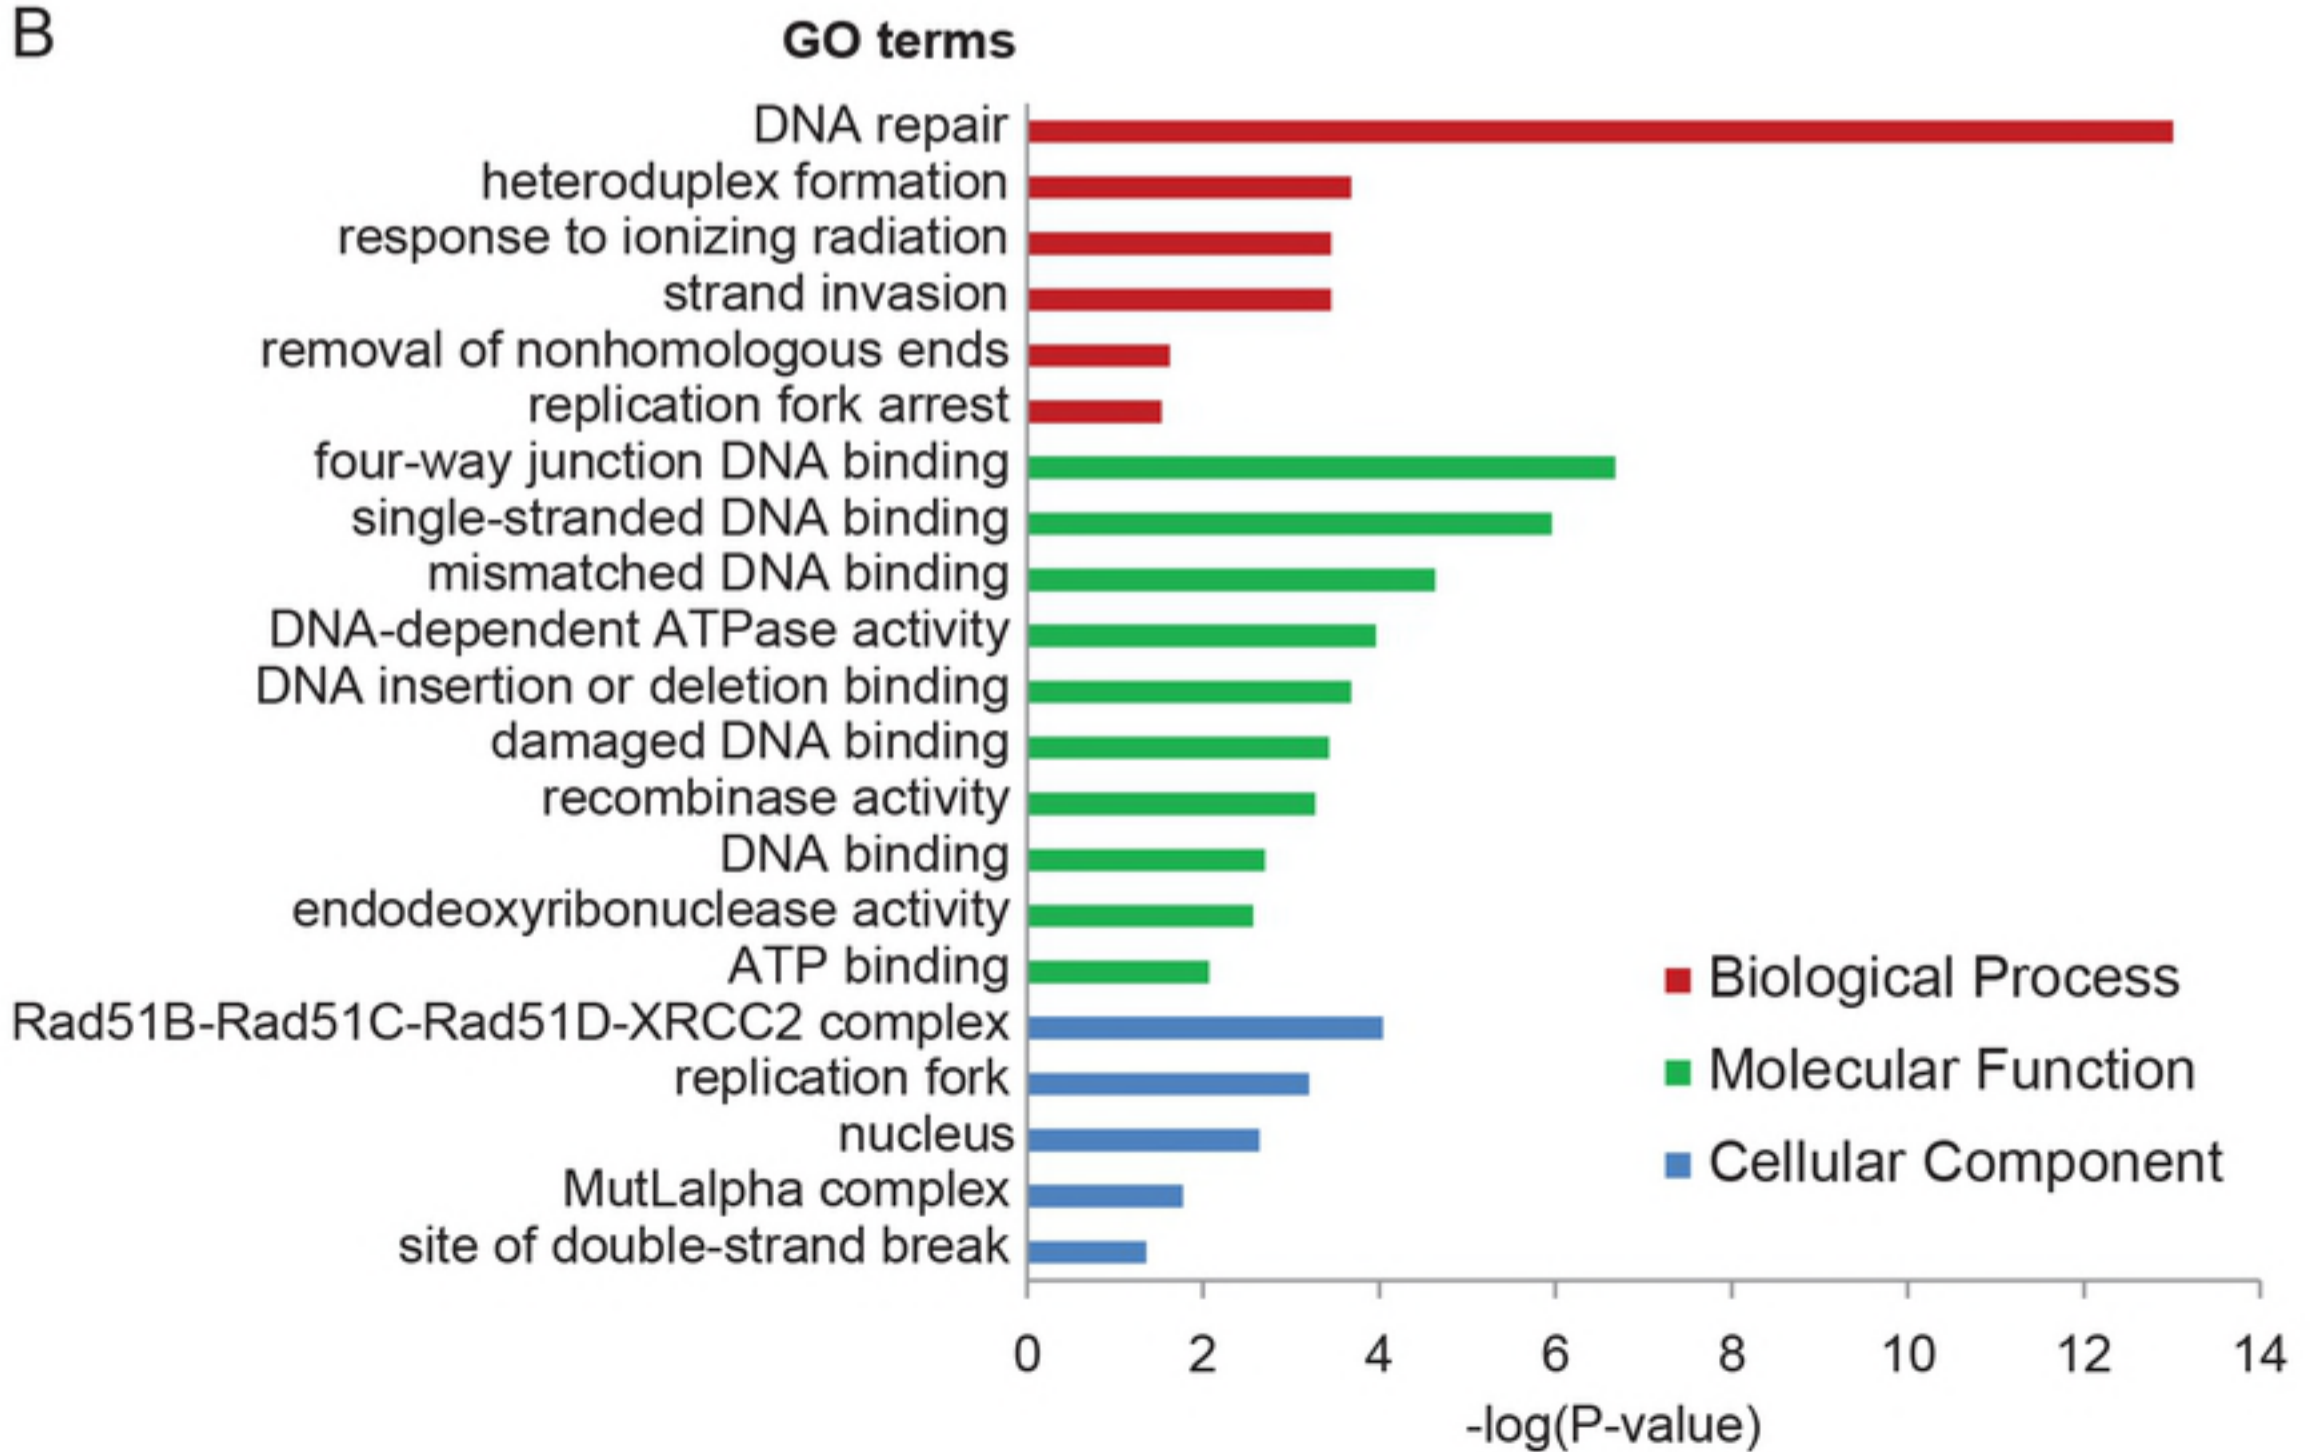

Figure 2

A

bioRxiv preprint doi: <https://doi.org/10.1101/492587>; this version posted December 15, 2018. The copyright holder for this preprint (which was not certified by peer review) is the author/funder, who has granted bioRxiv a license to display the preprint in perpetuity. It is made available under aCC-BY 4.0 International license.

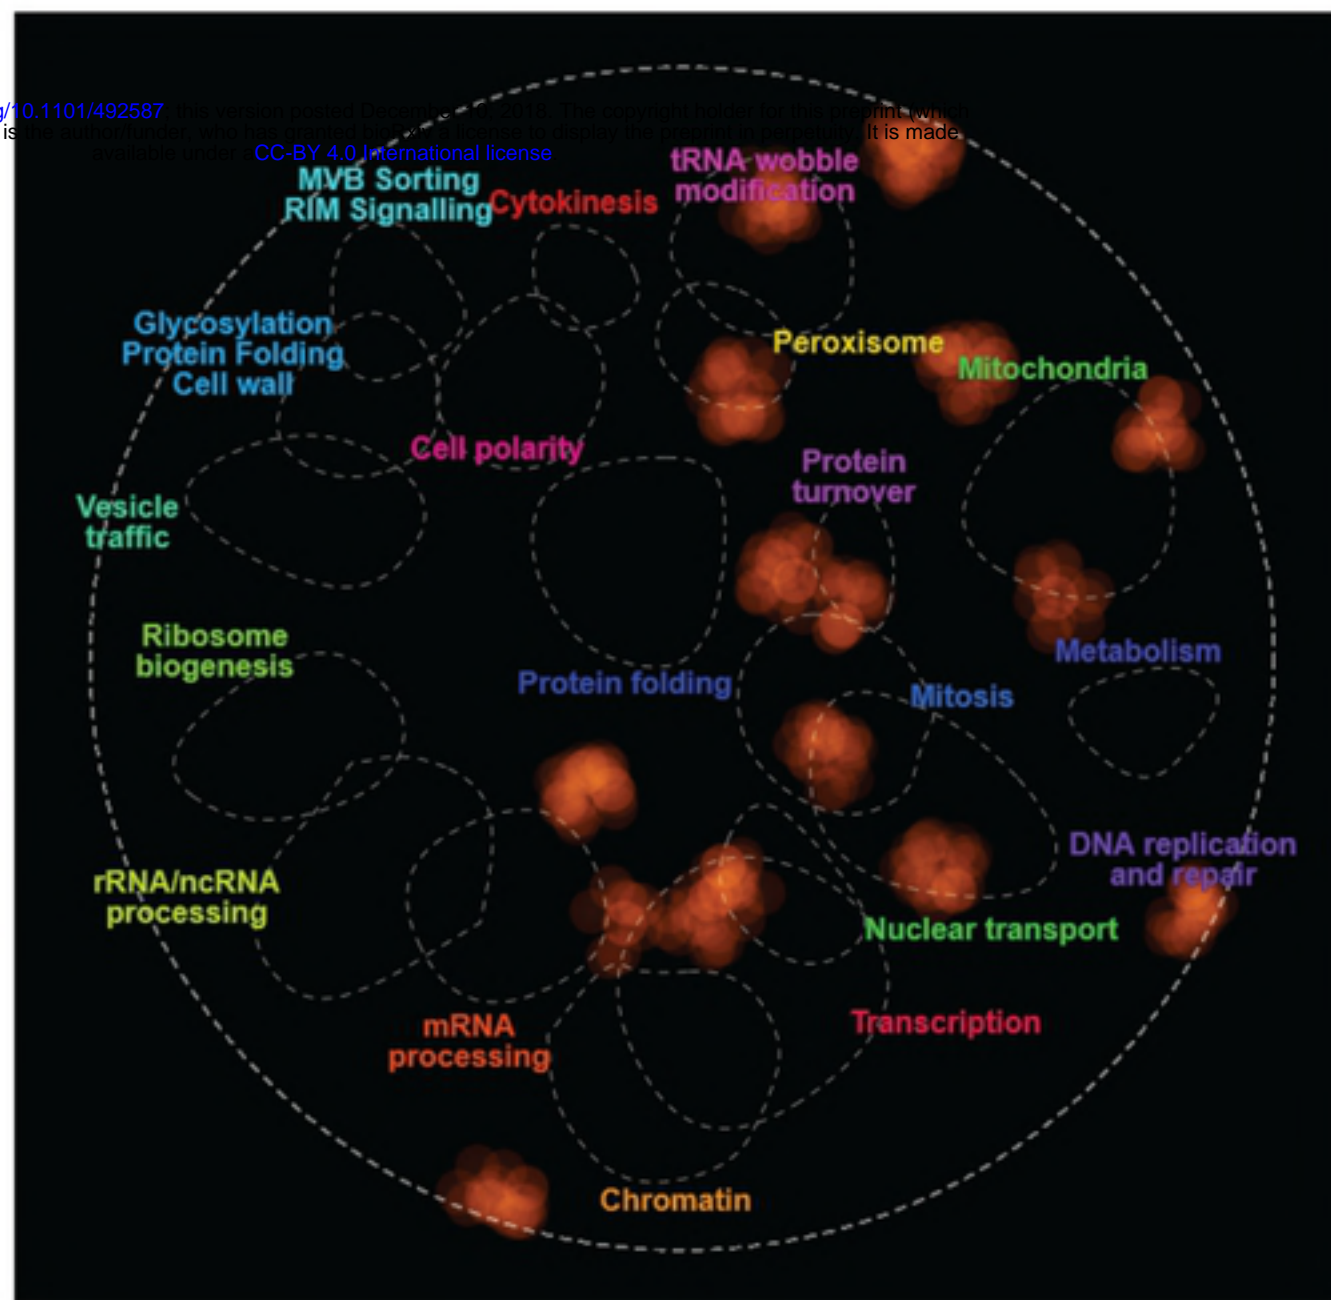

B

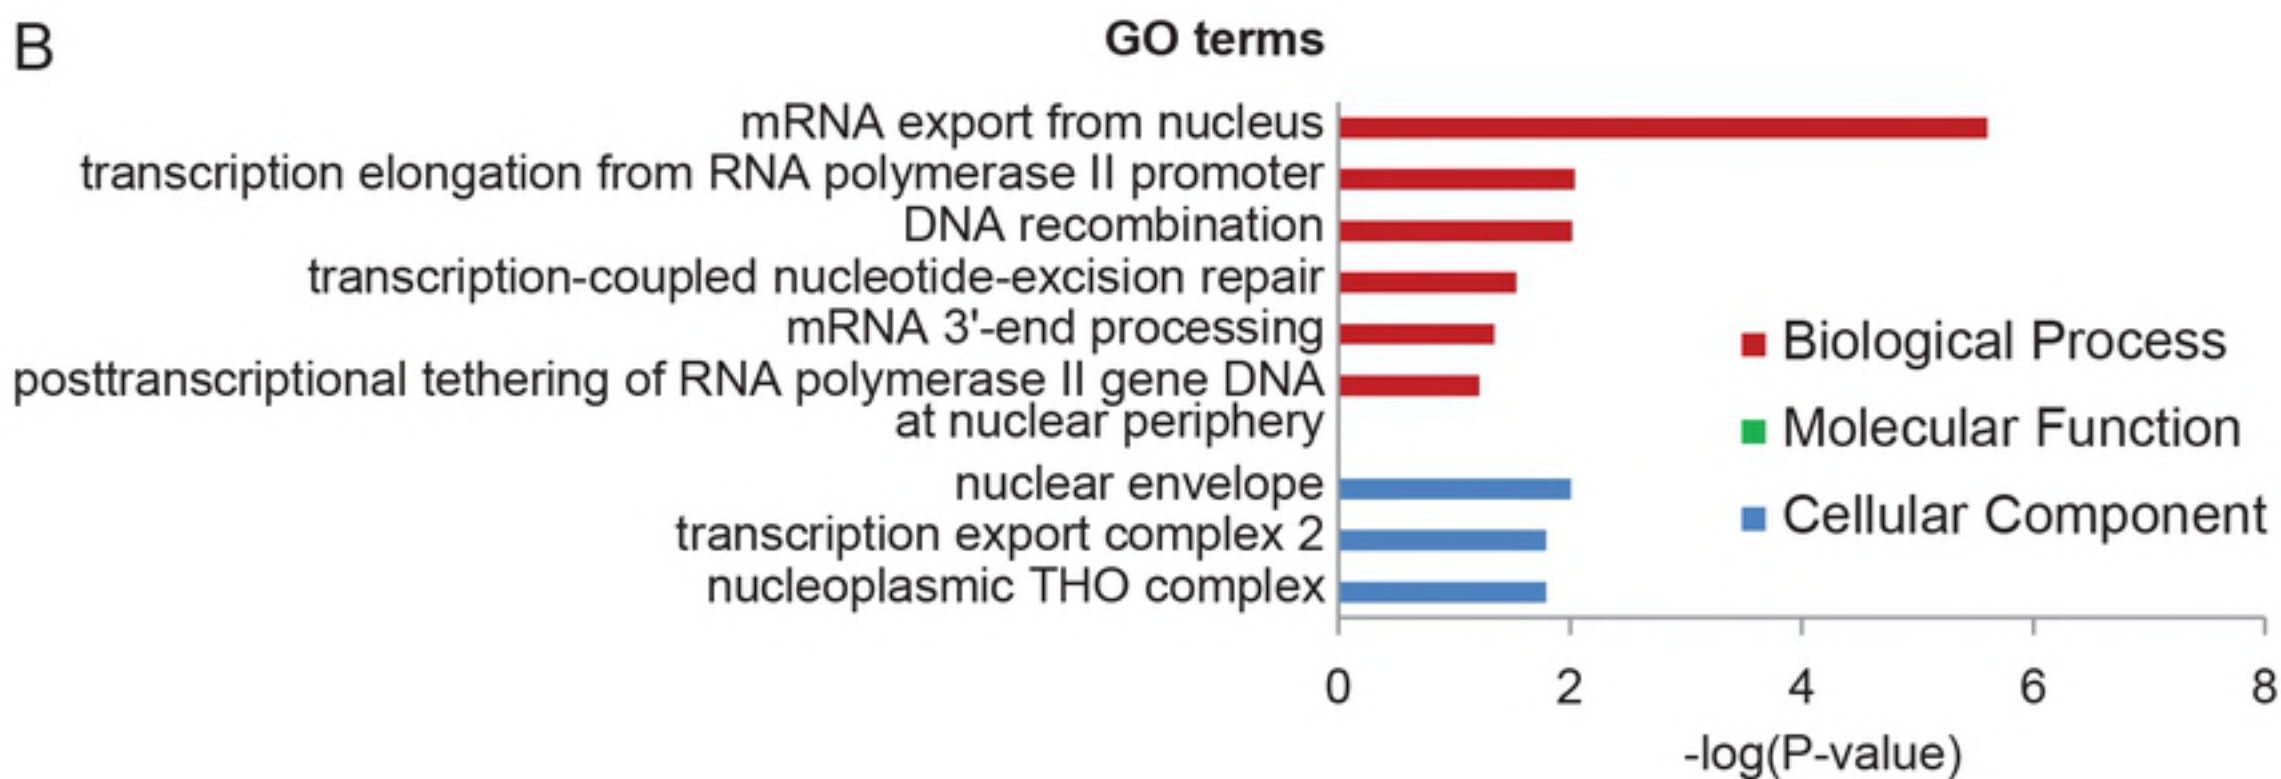

Figure 3



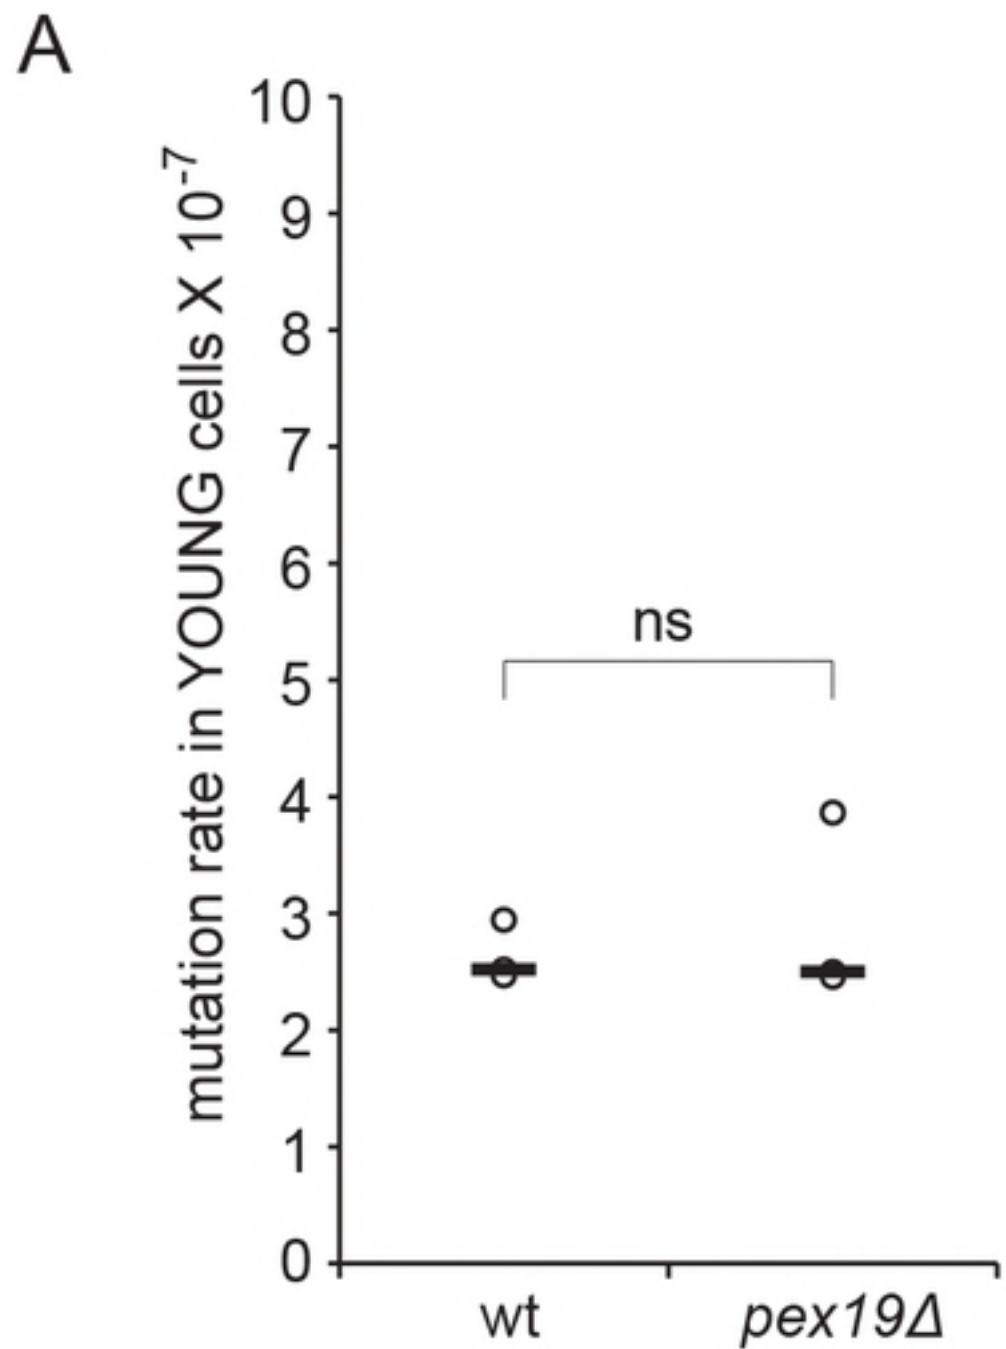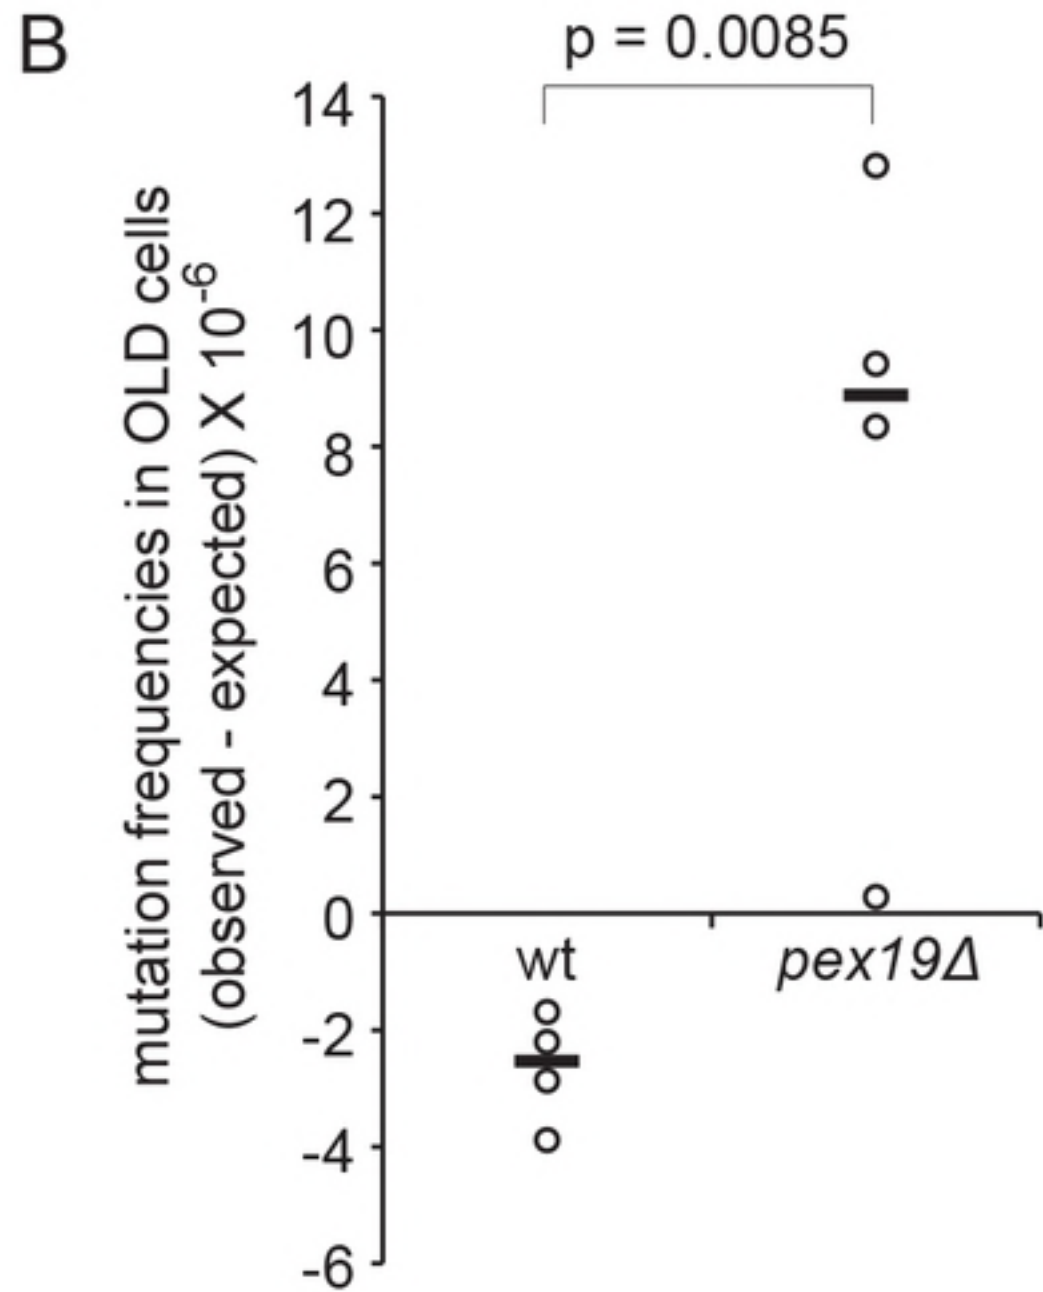

Figure 4
